1 ***Pdgfra* and *Pdgfrb* genetically interact in the murine neural crest cell lineage to**  
2 **regulate migration and proliferation**

3  
4 **Julia Mo<sup>1</sup>, Robert Long<sup>1</sup>, Katherine A. Fantauzzo<sup>1,\*</sup>**

5  
6 <sup>1</sup>Department of Craniofacial Biology, School of Dental Medicine, University of Colorado  
7 Anschutz Medical Campus, Aurora, CO, United States of America

8  
9 **\*Correspondence:**

10 Katherine A. Fantauzzo

11 [katherine.fantauzzo@cuanschutz.edu](mailto:katherine.fantauzzo@cuanschutz.edu)

12  
13 **Keywords: *Pdgfra*, *Pdgfrb*, neural crest, craniofacial, migration, proliferation**

14  
15 **Running title: PDGFRs interact in murine NCCs**

## 16 Abstract

17

18 Cranial neural crest cells (cNCCs) are migratory, multipotent cells that originate  
19 from the forebrain to the hindbrain and eventually give rise to the bone and cartilage of  
20 the frontonasal skeleton, among other derivatives. Signaling through the two members  
21 of the platelet-derived growth factor receptor (PDGFR) family of receptor tyrosine  
22 kinases, alpha and beta, plays critical roles in the cNCC lineage to regulate craniofacial  
23 development during murine embryogenesis. Further, the PDGFRs have been shown to  
24 genetically interact during murine craniofacial development at mid-to-late gestation.  
25 Here, we examined the effect of ablating both *Pdgfra* and *Pdgfrb* in the murine NCC  
26 lineage on earlier craniofacial development and determined the cellular mechanisms by  
27 which the observed phenotypes arose. Our results confirm a genetic interaction  
28 between the two receptors in this lineage, as phenotypes observed in an allelic series of  
29 mutant embryos often worsened with the addition of conditional alleles. The defects  
30 observed here were shown to stem from reduced cNCC stream size and aberrant cNCC  
31 directional migration, as well as decreased proliferation of the facial mesenchyme upon  
32 combined decreases in PDGFR $\alpha$  and PDGFR $\beta$  signaling. Importantly, we found that  
33 PDGFR $\alpha$  plays a predominant role in cNCC migration whereas PDGFR $\beta$  primarily  
34 contributes to proliferation of the facial mesenchyme. Our findings provide insight into  
35 the distinct mechanisms by which PDGFR $\alpha$  and PDGFR $\beta$  signaling regulate cNCC  
36 activity and subsequent craniofacial development in the mouse embryo.

37

## 38 Introduction

39

40 Neural crest cells (NCCs) are migratory, multipotent cells that play critical roles in  
41 vertebrate development. NCCs arise at the border of the neural ectoderm, undergo an  
42 epithelial to mesenchymal transition and subsequently delaminate from the cranial  
43 neural folds or dorsal neural tube during mammalian embryogenesis. Cranial NCCs  
44 (cNCCs) originate from the forebrain to the hindbrain and eventually give rise to the  
45 bone and cartilage of the frontonasal skeleton, as well as the cartilages of the jaw,  
46 middle ear, hyoid and thyroid, among other derivatives (Trainor, 2005; Mayor and  
47 Theveneau, 2013). At approximately embryonic day (E) 9.5 in the mouse, the process  
48 of craniofacial development begins with the formation of five facial prominences  
49 populated by post-migratory cNCCs. These prominences include the frontonasal  
50 prominence, a pair of maxillary prominences and a pair of mandibular prominences.  
51 Subsequent formation of the nasal pits divides the frontonasal prominence into the  
52 medial and lateral nasal processes, which will eventually fuse and give rise to the  
53 nostrils. A second fusion event occurs between the medial nasal processes and the  
54 maxillary prominences to form the upper lip. At this time the secondary palatal shelves  
55 first appear as morphologically distinct outgrowths on the oral side of the maxillary  
56 prominences. The shelves grow downward as they extend from the maxillae such that  
57 they are positioned on either side of the tongue. The palatal shelves elevate to a  
58 horizontal, apposing position above the tongue with development of the jaw and grow  
59 towards the midline. The palatal shelves fuse with one another upon meeting and  
60 eventually with two derivatives of the medial nasal processes, the primary palate  
61 anteriorly and the nasal septum superiorly, resulting in a continuous palate that

62 separates the oral and nasal cavities (Bush and Jiang, 2012). The complex  
63 morphogenetic process of craniofacial development requires a precise interplay of  
64 multiple cell and tissue types. As such, defects in craniofacial development, including  
65 cleft lip and palate, comprise one of the most prevalent birth defects in humans (Parker  
66 et al., 2010).

67 Signaling through the platelet-derived growth factor receptor (PDGFR) family of  
68 receptor tyrosine kinases plays a critical role in human craniofacial development. There  
69 are four PDGF ligands in mammals, PDGF-A-D, which signal through two receptors,  
70 PDGFR $\alpha$  and PDGFR $\beta$ . The homodimers PDGF-AA and PDGF-CC have been shown  
71 to solely activate PDGFR $\alpha$  signaling *in vivo* during mammalian development (Boström  
72 et al., 1996; Soriano, 1997; Ding et al., 2004), while PDGF-BB exclusively activates  
73 PDGFR $\beta$  signaling (Levéen et al., 1994; Soriano, 1994). Ligand binding induces  
74 PDGFR dimerization and activation of cytoplasmic tyrosine kinase domains, which in  
75 turn autophosphorylate intracellular tyrosine residues. Signaling molecules bind to  
76 specific phosphorylated residues in the cytoplasmic domains of the receptors and  
77 mediate downstream cellular responses through various intracellular signaling pathways  
78 (Heldin and Westermark, 1999). Heterozygous missense mutations in the human  
79 *PDGFRA* coding region and single base-pair substitutions in the 3' untranslated region  
80 are associated with nonsyndromic cleft palate (Rattanasopha et al., 2012). Further,  
81 single-nucleotide polymorphisms in the regulatory region of *PDGFC* which repress  
82 transcriptional activity of the promoter are associated with cleft lip and palate (Choi et  
83 al., 2009). Alternatively, heterozygous missense mutations in *PDGFRB* have been  
84 shown to cause Kosaki overgrowth syndrome (OMIM 616592) and Penttinen syndrome  
85 (OMM 601812), both of which are characterized by facial dysmorphism, among other  
86 defects (Johnston et al., 2015; Takenouchi et al., 2015).

87 The roles of PDGFR $\alpha$  and PDGFR $\beta$  in human craniofacial development are  
88 evolutionarily conserved in the mouse. Targeted disruption of *Pdgfra* in mice results in  
89 embryonic lethality during mid-gestation, with homozygous null embryos exhibiting facial  
90 clefting, subepidermal blebbing, edema, hemorrhaging, cardiac outflow tract defects,  
91 abnormalities in neural tube development, abnormally patterned somites and extensive  
92 skeletal defects affecting cNCC derivatives in the frontonasal skeleton, as well as non-  
93 NCC-derived axial skeletal elements (Soriano, 1997). These defects are phenocopied in  
94 embryos lacking both *Pdgfa* and *Pdgfc* (Ding et al., 2004). *Pdgfra* is expressed in  
95 migrating cNCCs and in the cNCC-derived mesenchyme of the facial processes during  
96 mid-gestation, among other sites, while its ligands, *Pdgfa* and *Pdgfc*, are reciprocally  
97 expressed in the overlying epithelium (Morrison-Graham et al., 1992; Orr-Urtreger and  
98 Lonai, 1992; Ding et al., 2000; Hamilton et al., 2003; He and Soriano, 2013; Fantauzzo  
99 and Soriano, 2016). Conditional ablation of *Pdgfra* in the NCC lineage using the *Wnt1-  
100 Cre* driver (Danielian et al., 1998) generates a subset of the null phenotypes, including  
101 facial clefting, midline hemorrhaging, aortic arch defects and thymus hypoplasia  
102 (Tallquist and Soriano, 2003; He and Soriano, 2013). *Pdgfra*<sup>fl/fl</sup>;*Wnt1-Cre*<sup>+Tg</sup> embryos  
103 exhibit a delay in NCC migration into the frontonasal prominence at E9.5 and fewer  
104 NCCs in pharyngeal arches 3-6 at E10.5, with bifurcation of the streams entering these  
105 arches in a subset of embryos (He and Soriano, 2013). Additionally, these embryos  
106 have decreased proliferation in the frontonasal and medial nasal processes at E9.5 and  
107 E11.5, respectively (He and Soriano, 2013). Similarly, PDGFR $\alpha$  signaling has been

108 shown to regulate cell survival and proliferation of the cNCC-derived mesenchyme  
109 contributing to the palatal shelves at E13.5 (Fantauzzo and Soriano, 2014). Conditional  
110 ablation of *Pdgfra* specifically in cNCCs using the *Sox10ER<sup>T2</sup>CreER<sup>T2</sup>* driver and  
111 following administration of tamoxifen at E7.5 likewise leads to fewer NCCs in the  
112 craniofacial region at E10.5, decreased proliferation in the medial nasal process at  
113 E11.5 and eventual frontonasal dysplasia (He and Soriano, 2015). Interestingly, use of  
114 this driver revealed a novel requirement for PDGFR $\alpha$  in the mandible, as  
115 *Pdgfra<sup>fl/fl</sup>;Sox10ER<sup>T2</sup>CreER<sup>T2</sup>* embryos additionally exhibited decreased proliferation in  
116 the mandibular mesenchyme at E11.5 and mandibular hypoplasia at E16.5 (He and  
117 Soriano, 2015). Conversely, both *Pdgfrb*- and *Pdgfb*-deficient mice die perinatally and  
118 exhibit edema, hemorrhaging, cardiac ventricular septal defects, thrombocytopenia,  
119 anemia and kidney defects (Levéen et al., 1994; Soriano, 1994). *Pdgfrb* is also  
120 expressed in the embryonic craniofacial mesenchyme (Soriano, 1994; Fantauzzo and  
121 Soriano, 2016; McCarthy et al., 2016) and ablation of *Pdgfrb* in the NCC lineage results  
122 in increased nasal septum width, delayed palatal shelf development and subepidermal  
123 blebbing in a subset of embryos (Fantauzzo and Soriano, 2016). Though the etiology of  
124 these defects is currently unknown, *Pdgfrb<sup>fl/fl</sup>;Wnt1-Cre<sup>+Tg</sup>* embryos do not have obvious  
125 defects in NCC migration into the facial processes and pharyngeal arches at E8.5-E10.5  
126 (Fantauzzo and Soriano, 2016).

127 The PDGFRs have been shown to genetically interact during murine craniofacial  
128 and heart development. While a previous skeletal analysis in which both *Pdgfra* and  
129 *Pdgfrb* were simultaneously conditionally ablated in the NCC lineage did not detect  
130 additional frontonasal midline defects in double-homozygous mutant embryos beyond  
131 those observed in *Pdgfra<sup>fl/fl</sup>;Wnt1-Cre<sup>+Tg</sup>* embryos (McCarthy et al., 2016),  
132 malformations in the basisphenoid, alisphenoid and hyoid bones at E17.5, as well as  
133 defects in multiple cardiac NCC derivatives at E14.5-E18.5, were observed that were  
134 more severe than those found in either single-homozygous mutant alone (Richarte et  
135 al., 2007; McCarthy et al., 2016). The latter phenotype was shown to arise from cardiac  
136 NCC migration defects into the outflow tract as early as E10.5 and not from defects in  
137 proliferation nor survival of cells in the conotruncal region between E10.5-E12.5  
138 (Richarte et al., 2007). Phosphatidylinositol 3-kinase (PI3K) has been identified as the  
139 main downstream effector of PDGFR $\alpha$  signaling during murine embryonic development  
140 (Klinghoffer et al., 2002). Embryos homozygous for an autophosphorylation mutant  
141 knock-in allele (*Pdgfra<sup>PI3K</sup>*) in which PDGFR $\alpha$  is unable to bind PI3K die perinatally and  
142 display a cleft palate, among other defects (Klinghoffer et al., 2002; Fantauzzo and  
143 Soriano, 2014), which is less severe than the complete facial clefting phenotype  
144 observed in *Pdgfra<sup>fl/fl</sup>;Wnt1-Cre<sup>+Tg</sup>* embryos (Tallquist and Soriano, 2003; He and  
145 Soriano, 2013). While *Pdgfra<sup>PI3K/PI3K</sup>* embryos do not exhibit NCC migration defects at  
146 E9.5-E10.5 (He and Soriano, 2013), primary mouse embryonic palatal mesenchyme  
147 cells (MEPMs) derived from E13.5 *Pdgfra<sup>PI3K/PI3K</sup>* embryos fail to proliferate in response  
148 to PDGF-AA ligand treatment (He and Soriano, 2013; Fantauzzo and Soriano, 2014).  
149 When the constitutive *Pdgfra<sup>PI3K</sup>* allele was combined with the conditional *Pdgfrb<sup>fl</sup>* allele  
150 and the *Wnt1-Cre* driver, E13.5 double-homozygous mutant embryos had an overt  
151 facial clefting phenotype not observed in either single-homozygous mutant (Fantauzzo  
152 and Soriano, 2016). Further, introduction of a single *Pdgfrb<sup>fl</sup>* allele exacerbated the  
153 midline defects observed in *Pdgfra<sup>PI3K/PI3K</sup>* skeletons at E16.5 such that

154 *Pdgfra*<sup>PI3K/PI3K</sup>;*Pdgfrb*<sup>+fl</sup>;*Wnt1-Cre*<sup>+Tg</sup> skeletons additionally exhibited upturned and  
155 clefted nasal cartilage, a widening of the gap between the premaxilla bones and  
156 generalized broadening of the skull (Fantauzzo and Soriano, 2016), similar to the  
157 craniofacial skeletal defects observed upon conditional ablation of *Pdgfra* in the NCC  
158 lineage (Tallquist and Soriano, 2003; He and Soriano, 2013).

159 To examine the effect of ablating both *Pdgfra* and *Pdgfrb* in the murine NCC  
160 lineage on earlier craniofacial development and to determine the cellular mechanisms  
161 by which the observed phenotypes arise, we analyzed an allelic series of mutant  
162 embryos. Our results confirm a genetic interaction between the two receptors in this  
163 lineage and demonstrate that PDGFR $\alpha$  plays a predominant role in cNCC migration  
164 whereas PDGFR $\beta$  exerts its effect primarily through the regulation of proliferation in the  
165 facial mesenchyme.

166

## 167 **Materials and Methods**

168

### 169 *Mouse strains*

170 All animal experimentation was approved by the Institutional Animal Care and  
171 Use Committee of the University of Colorado Anschutz Medical Campus. *Pdgfra*<sup>tm8Sor</sup>  
172 mice (Tallquist and Soriano, 2003), referred to in the text as *Pdgfra*<sup>fl</sup>; *Pdgfrb*<sup>tm11Sor</sup> mice  
173 (Schmahl et al., 2008), referred to in the text as *Pdgfrb*<sup>fl</sup>; *H2afv*<sup>Tg(Wnt1-cre)11Rth</sup> mice  
174 (Danielian et al., 1998), referred to in the text as *Wnt1-Cre*<sup>Tg</sup>; and  
175 *Gt(ROSA)26Sor*<sup>tm4(ACTB-tdTomato,-EGFP)Luo</sup> mice (Muzumdar et al., 2007), referred to in the  
176 text as *ROSA26*<sup>mTmG</sup>, were maintained on a 129S4 coisogenic genetic background.  
177 Statistical analyses of Mendelian inheritance were performed with the GraphPad  
178 QuickCalcs data analysis resource (GraphPad Software, Inc., La Jolla, CA, USA) using  
179 a chi-square test. Statistical analyses of litter sizes were performed Prism 8 (GraphPad  
180 Software, Inc.) using a two-tailed, unpaired t-test with Welch's correction.

181

### 182 *Morphological analysis*

183 Embryos were dissected at multiple timepoints (day of plug considered 0.5 days)  
184 in 1x phosphate buffered saline (PBS) and fixed overnight at 4°C in 4%  
185 paraformaldehyde (PFA) in PBS. Embryos were photographed using an Axiocam 105  
186 color digital camera (Carl Zeiss, Inc., Thornwood, NY, USA) fitted onto a Stemi 508  
187 stereo microscope (Carl Zeiss, Inc.). Distances between nasal pits were measured  
188 using Photoshop software v 21.1.1 (Adobe, San Jose, CA, USA). Statistical analyses  
189 were performed with Prism 8 (GraphPad Software, Inc.) using a two-tailed, unpaired t-  
190 test with Welch's correction and Welch and Brown-Forsythe ANOVA tests.

191

### 192 *Whole-mount DAPI staining*

193 Whole-mount 4',6-diamidino-2-phenylindole (DAPI) staining was performed  
194 according to a previously published protocol (Sandell et al., 2012), with the exception  
195 that staining was performed with 10  $\mu$ g/mL DAPI (Sigma-Aldrich Corp., St. Louis, MO,  
196 USA) for 1 hr at room temperature. Embryos were photographed using an Axiocam 506  
197 mono digital camera (Carl Zeiss, Inc.) fitted onto an Axio Observer 7 fluorescence  
198 microscope (Carl Zeiss, Inc.). Extended Depth of Focus was applied to z-stacks using  
199 ZEN Blue software (Carl Zeiss, Inc.) to generate images with the maximum depth of

200 field. An Unsharp Mask was applied to select images of NCC streams at E10.5 using  
201 ImageJ software (version 2.0.0-rc-69/1.52p; National Institutes of Health) with radius 40  
202 pixels and mask weight 0.90. Anterior-posterior heights and dorsal-ventral lengths of  
203 NCC streams in at least three embryos per genotype per timepoint were measured  
204 using ZEN Blue software (Carl Zeiss, Inc.). Statistical analyses were performed with  
205 Prism 8 (GraphPad Software, Inc.) using a two-tailed, unpaired t-test with Welch's  
206 correction and Welch and Brown-Forsythe ANOVA tests.

207

#### 208 *TUNEL assay*

209 Embryos were fixed in 4% PFA in PBS and infiltrated with 30% sucrose in PBS  
210 before being mounted in O.C.T. compound (Sakura Finetek USA Inc., Torrance, CA,  
211 USA). Sections (8  $\mu$ m) were deposited on glass slides. Apoptotic cells were identified  
212 using the *In Situ* Cell Death Detection Kit, Fluorescein (Sigma-Aldrich Corp.) according  
213 to the manufacturer's instructions for the treatment of cryopreserved tissue sections.  
214 Sections were mounted in VECTASHIELD® Antifade Mounting Medium with DAPI  
215 (Vector Laboratories, Burlingame, CA, USA) and photographed using an Axiocam 506  
216 mono digital camera (Carl Zeiss, Inc.) fitted onto an Axio Observed 7 fluorescence  
217 microscope (Carl Zeiss, Inc.). All positive signals were confirmed by DAPI staining. The  
218 percentage of TUNEL-positive cells was determined in three embryos per genotype per  
219 timepoint. Statistical analyses were performed with Prism 8 (GraphPad Software, Inc.)  
220 using a two-tailed, unpaired t-test with Welch's correction and Welch and Brown-  
221 Forsythe ANOVA tests.

222

#### 223 *Ki67 Immunofluorescence analysis*

224 Sections (8  $\mu$ m) of PFA-fixed, sucrose-infiltrated, O.C.T.-mounted embryos were  
225 deposited on glass slides. Sections were fixed in 4% PFA in PBS with 0.1% Triton X-  
226 100 for 10 min and washed in PBS with 0.1% Triton-X 100. Sections were blocked for 1  
227 hr in 5% normal donkey serum (Jackson ImmunoResearch Inc., West Grove, PA, USA)  
228 in PBS and incubated overnight at 4°C in anti-Ki67 primary antibody (1:300; Invitrogen,  
229 Carlsbad, CA, USA) in 1% normal donkey serum in PBS. After washing in PBS,  
230 sections were incubated in Alexa Fluor 488-conjugated donkey anti-rabbit secondary  
231 antibody (1:1,000; Invitrogen) diluted in 1% normal donkey serum in PBS with 2  $\mu$ g/mL  
232 DAPI (Sigma-Aldrich Corp.) for 1 hr. Sections were mounted in Aqua Poly/Mount  
233 mounting medium (Polysciences, Inc., Warrington, PA, USA) and photographed using  
234 an Axiocam 506 mono digital camera (Carl Zeiss, Inc.) fitted onto an Axio Observer 7  
235 fluorescence microscope (Carl Zeiss, Inc.). All positive signals were confirmed by DAPI  
236 staining. The percentage of Ki67-positive cells was determined in three embryos per  
237 genotype per timepoint. Statistical analyses were performed with Prism 8 (GraphPad  
238 Software, Inc.) using a two-tailed, unpaired t-test with Welch's correction and Welch and  
239 Brown-Forsythe ANOVA tests.

240

#### 241 *Cell culture and growth assays*

242 Primary mouse embryonic palatal mesenchyme (MEPM) cells were isolated from  
243 the palatal shelves of embryos dissected at E13.5 in PBS and cultured in medium  
244 (Dulbecco's modified Eagle's medium (GIBCO, Invitrogen) supplemented with 50 U/mL  
245 penicillin (GIBCO), 50  $\mu$ g/mL streptomycin (GIBCO) and 2 mM L-glutamine (GIBCO))

246 containing 10% fetal bovine serum (FBS; HyClone Laboratories, Inc., Logan, UT, USA)  
247 as previously described (Bush and Soriano, 2010). For cell growth assays, 11,500  
248 passage 2 MEPM cells were seeded into wells of a 24-well plate and cultured in  
249 medium containing 10% FBS. After 24 hrs, medium was aspirated and replaced with  
250 fresh medium containing 10% FBS (growth medium) or 0.1% FBS (starvation medium).  
251 After an additional 24 hrs, select wells were treated daily with 10 ng/mL PDGF-AA,  
252 PDGF-BB or PDGF-DD ligand (R&D Systems, Minneapolis, MN, USA) for up to 4 d.  
253 Cells were subsequently fixed in 4% PFA in PBS, stained with 0.1% crystal violet in  
254 10% ethanol, extracted with 10% acetic acid and the absorbance measured at 590 nm.  
255 Data represent results from three independent trials, each consisting of MEPMs derived  
256 from one heterozygous embryo and at least one conditional knock-out littermate.  
257 Statistical analyses were performed with Prism 8 (GraphPad Software, Inc.) using a  
258 two-tailed, unpaired t-test with Welch's correction and Welch and Brown-Forsythe  
259 ANOVA tests.

260

## 261 Results

262

### 263 *Pdgfra* and *Pdgfrb* genetically interact in the NCC lineage

264 To examine the effect of ablating both *Pdgfra* and *Pdgfrb* in the NCC lineage on  
265 mid-gestation craniofacial development, we intercrossed *Pdgfra<sup>fl/fl</sup>;Pdgfrb<sup>fl/fl</sup>* mice with  
266 *Pdgfra<sup>+fl</sup>;Pdgfrb<sup>+fl</sup>;Wnt1-Cre<sup>+Tg</sup>* mice and harvested the resulting progeny at E10.5 for  
267 gross morphological examination. Double-homozygous mutant embryos were recovered  
268 at Mendelian frequencies at this timepoint (16 embryos vs. 14 expected embryos out of  
269 109 total,  $\chi^2$  two-tailed  $p = 0.4915$ ) (Table 1). A small percentage of embryos across  
270 several of the eight allele combinations from the intercrosses exhibited an abnormal  
271 head shape due to a misshapen forebrain and/or midbrain, blebbing of the surface  
272 ectoderm in the facial region and/or facial hemorrhaging (Table 1). Further, 18% of  
273 *Pdgfra<sup>fl/fl</sup>;Pdgfrb<sup>+fl</sup>;Wnt1-Cre<sup>+Tg</sup>* embryos displayed ventral body wall closure defects ( $n$   
274 = 11) (Table 1).

275 We next measured the distance between nasal pits in E10.5 embryos as a  
276 readout of defects at the facial midline, revealing a significant difference in  
277 measurements across one control (*Pdgfra<sup>+fl</sup>;Pdgfrb<sup>+fl</sup>;Wnt1-Cre<sup>+/+</sup>*) and the four  
278 experimental genotypes containing the *Wnt1-Cre* transgene (Welch's ANOVA test  $p =$   
279  $0.0001$ ; Brown-Forsythe ANOVA test  $p < 0.0001$ ). The distance between nasal pits was  
280 significantly increased in *Pdgfra<sup>+fl</sup>;Pdgfrb<sup>fl/fl</sup>;Wnt1-Cre<sup>+Tg</sup>* embryos ( $1246 \pm 34.12 \mu\text{m}$ ,  $p$   
281  $= 0.0304$ ), *Pdgfra<sup>fl/fl</sup>;Pdgfrb<sup>+fl</sup>;Wnt1-Cre<sup>+Tg</sup>* embryos ( $1430 \pm 31.08 \mu\text{m}$ ,  $p < 0.0001$ ) and  
282 double-homozygous mutant embryos ( $1349 \pm 22.44 \mu\text{m}$ ,  $p = 0.0006$ ) compared to  
283 control *Pdgfra<sup>+fl</sup>;Pdgfrb<sup>+fl</sup>;Wnt1-Cre<sup>+/+</sup>* embryos ( $1107 \pm 46.41 \mu\text{m}$ ) (Figure 1). While  
284 double-heterozygous mutant embryos had a larger distance between nasal pits than  
285 control embryos, this difference was not statistically significant (Figure 1). Interestingly,  
286 the greatest distance between nasal pits was observed in *Pdgfra<sup>fl/fl</sup>;Pdgfrb<sup>+fl</sup>;Wnt1-*  
287 *Cre<sup>+Tg</sup>* embryos, though this distance was not significantly different between these and  
288 double-homozygous mutant embryos (Figure 1).

289 To determine whether the above craniofacial phenotypes persisted or worsened  
290 at later timepoints, embryos were harvested at E13.5 from the same intercrosses. While  
291 the presence of the *Wnt1-Cre* transgene always exacerbated E13.5 facial phenotypes,

292 facial blebbing was detected in a subset of embryos upon combination of at least three  
293 out of four conditional alleles in the absence of the *Wnt1-Cre* transgene, reaching a  
294 prevalence of 83% in *Pdgfra<sup>fl/fl</sup>;Pdgfrb<sup>+/fl</sup>;Wnt1-Cre<sup>+/+</sup>* embryos (n = 12) (Table 2; Figure  
295 2E,G). Further, facial hemorrhaging was noted in approximately 15% of  
296 *Pdgfra<sup>fl/fl</sup>;Pdgfrb<sup>+/fl</sup>;Wnt1-Cre<sup>+/+</sup>* embryos (n = 12) and double-homozygous mutant  
297 embryos (n = 14) (Table 2). These results indicate that one or both of the conditional  
298 alleles are hypomorphic. Double-homozygous mutant embryos were recovered at  
299 Mendelian frequencies at this timepoint as well (eight embryos vs. 12 expected embryos  
300 out of 93 total,  $\chi^2$  two-tailed p = 0.2557) (Table 2). A fully-penetrant, overt facial clefting  
301 phenotype was observed in *Pdgfra<sup>fl/fl</sup>;Pdgfrb<sup>+/fl</sup>;Wnt1-Cre<sup>+Tg</sup>* embryos (100%; n = 12)  
302 (Figure 2F') and double-homozygous mutant embryos (100%; n = 8) (Figure 2H'),  
303 though not in any of the other six allele combinations from the intercrosses (n = 73)  
304 (Table 2). Facial blebbing was detected in the majority of embryos among the four  
305 genotypes containing the *Wnt1-Cre* allele and was fully penetrant in  
306 *Pdgfra<sup>fl/fl</sup>;Pdgfrb<sup>+/fl</sup>;Wnt1-Cre<sup>+Tg</sup>* embryos (100%; n = 12) (Table 2; Figure  
307 2B,D,D',F,F',H,H'). Similarly, facial hemorrhaging was observed in the majority of  
308 embryos containing at least three out of four conditional alleles in combination with the  
309 *Wnt1-Cre* transgene and was fully penetrant in double-homozygous mutant embryos  
310 (100%; n = 8) (Table 2; Figure 2D,D',F,F',H,H'). Together, these results demonstrate  
311 that *Pdgfra* and *Pdgfrb* genetically interact in the NCC lineage, with PDGFR $\alpha$  playing a  
312 more predominant role in NCC-mediated craniofacial development.

313

314 *PDGFR $\alpha$*  and, to a lesser extent, *PDGFR $\beta$*  regulate cNCC stream size and directional  
315 migration

316 We next introduced the *ROSA26<sup>mTmG</sup>* double-fluorescent Cre reporter allele  
317 (Muzumdar et al., 2007) into the above intercrosses to examine the timing, extent and  
318 pattern of NCC migration at E9.5-E10.5. Whereas streams entering pharyngeal arches  
319 1 (PA1) and 2 (PA2) were readily apparent in all embryos assayed at E9.5 (Figure 3A-  
320 E''), there was a trend for the stream entering PA1 to be shorter along the anterior-  
321 posterior axis in embryos with the four experimental genotypes than in control  
322 *Pdgfra<sup>+/+</sup>;Pdgfrb<sup>+/+</sup>;Wnt1-Cre<sup>+Tg</sup>* embryos (Figure 3F). Further, the anterior-posterior  
323 height and dorsal-ventral length of the stream entering PA2 were significantly shorter in  
324 *Pdgfra<sup>fl/fl</sup>;Pdgfrb<sup>+/fl</sup>;Wnt1-Cre<sup>+Tg</sup>* embryos ( $82.22 \pm 5.188 \mu\text{m}$ ;  $351.3 \pm 13.25 \mu\text{m}$ ) than in  
325 both control *Pdgfra<sup>+/+</sup>;Pdgfrb<sup>+/+</sup>;Wnt1-Cre<sup>+Tg</sup>* embryos ( $110.0 \pm 5.310 \mu\text{m}$ , p = 0.0146;  
326  $424.3 \pm 14.20 \mu\text{m}$ , p = 0.0150) and *Pdgfra<sup>+/fl</sup>;Pdgfrb<sup>fl/fl</sup>;Wnt1-Cre<sup>+Tg</sup>* embryos ( $102.5 \pm$   
327  $4.473 \mu\text{m}$ , p = 0.0259;  $400.5 \pm 12.93 \mu\text{m}$ , p = 0.0376) (Figure 3F). The height of the  
328 stream entering PA2 was also significantly shorter in double-homozygous mutant  
329 embryos ( $362.8 \pm 11.99 \mu\text{m}$ ) compared to control *Pdgfra<sup>+/+</sup>;Pdgfrb<sup>+/+</sup>;Wnt1-Cre<sup>+Tg</sup>*  
330 embryos ( $424.3 \pm 14.20 \mu\text{m}$ , p = 0.0309) (Figure 3F). These results demonstrate that  
331 combined decreases in PDGFR $\alpha$  and PDGFR $\beta$  signaling lead to cNCC streams  
332 entering PA1 and PA2 that are reduced in size at E9.5.

333 At E10.5, whereas double-heterozygous mutant embryos (Figure 4B-B''')  
334 appeared similar to control *Pdgfra<sup>+/+</sup>;Pdgfrb<sup>+/+</sup>;Wnt1-Cre<sup>+Tg</sup>* embryos (Figure 4A,A') with  
335 clearly delineated NCC streams with high cell density entering pharyngeal arches 3  
336 (PA3) and 4 (PA4), *Pdgfra<sup>+/fl</sup>;Pdgfrb<sup>fl/fl</sup>;Wnt1-Cre<sup>+Tg</sup>* embryos had streams with mild  
337 bifurcations (Figure 4C-C'''), and *Pdgfra<sup>fl/fl</sup>;Pdgfrb<sup>+/fl</sup>;Wnt1-Cre<sup>+Tg</sup>* embryos had weak,



338 diffuse streams with low cell density and more severe bifurcations (Figure 4D-D’’’).  
339 Interestingly, the double-homozygous embryo phenotype was again less severe than  
340 that of *Pdgfra<sup>fl/fl</sup>;Pdgfrb<sup>+/fl</sup>;Wnt1-Cre<sup>+Tg</sup>* embryos. Double-homozygous mutant embryos  
341 also exhibited weak streams with low cell density, but no apparent diffusion of the  
342 streams, and only mild bifurcations (Figure 4E’-E’’’). While the anterior-posterior heights  
343 of the streams entering PA3 and PA4 did not vary significantly among control  
344 *Pdgfra<sup>+/+</sup>;Pdgfrb<sup>+/+</sup>;Wnt1-Cre<sup>+Tg</sup>* embryos and embryos with the four experimental  
345 genotypes, there was a trend for the streams from double-heterozygous mutant  
346 embryos and *Pdgfra<sup>fl/fl</sup>;Pdgfrb<sup>+/fl</sup>;Wnt1-Cre<sup>+Tg</sup>* embryos to be taller than those from  
347 *Pdgfra<sup>+/fl</sup>;Pdgfrb<sup>fl/fl</sup>;Wnt1-Cre<sup>+Tg</sup>* embryos and double-homozygous mutant embryos  
348 (Figure 4F). Alternatively, while the dorsal-ventral lengths of the streams entering PA3  
349 and PA4 also did not vary significantly between genotypes, there was a trend for the  
350 streams from *Pdgfra<sup>fl/fl</sup>;Pdgfrb<sup>+/fl</sup>;Wnt1-Cre<sup>+Tg</sup>* embryos and double-homozygous mutant  
351 embryos to be longer than those from double-heterozygous mutant embryos and  
352 *Pdgfra<sup>+/fl</sup>;Pdgfrb<sup>fl/fl</sup>;Wnt1-Cre<sup>+Tg</sup>* embryos (Figure 4F).

353 The above E10.5 embryos were then scored for bifurcations in streams entering  
354 PA3-PA4 and intermingling of the two streams. For a handful of embryos with a  
355 relatively high number of somite pairs ( $\geq 39$ ), the stream entering PA3 was no longer  
356 visible and hence was not assayed for bifurcation or intermingling with the stream  
357 entering PA4. The stream entering PA3 was not bifurcated in any of the double-  
358 heterozygous mutant embryos ( $n = 4$ ), but was found to be bifurcated in 33% of  
359 *Pdgfra<sup>+/fl</sup>;Pdgfrb<sup>fl/fl</sup>;Wnt1-Cre<sup>+Tg</sup>* embryos ( $n = 3$ ), 50% of *Pdgfra<sup>fl/fl</sup>;Pdgfrb<sup>+/fl</sup>;Wnt1-Cre<sup>+Tg</sup>*  
360 embryos ( $n = 2$ ) and 67% of double-homozygous mutant embryos ( $n = 3$ ) (Table 3).  
361 Bifurcation of the stream entering PA4 was observed in 40% of double-heterozygous  
362 mutant embryos ( $n = 5$ ), 67% of *Pdgfra<sup>fl/fl</sup>;Pdgfrb<sup>+/fl</sup>;Wnt1-Cre<sup>+Tg</sup>* embryos ( $n = 3$ ) and  
363 was fully penetrant in *Pdgfra<sup>+/fl</sup>;Pdgfrb<sup>fl/fl</sup>;Wnt1-Cre<sup>+Tg</sup>* embryos (100%;  $n = 3$ ) and  
364 double-homozygous mutant embryos (100%;  $n = 4$ ) (Table 3). Finally, the streams  
365 entering PA3-PA4 were intermingled in 75% of double-heterozygous mutant embryos ( $n$   
366  $= 4$ ) and in all *Pdgfra<sup>+/fl</sup>;Pdgfrb<sup>fl/fl</sup>;Wnt1-Cre<sup>+Tg</sup>* embryos (100%;  $n = 3$ ),  
367 *Pdgfra<sup>fl/fl</sup>;Pdgfrb<sup>+/fl</sup>;Wnt1-Cre<sup>+Tg</sup>* embryos (100%;  $n = 2$ ) and double-homozygous mutant  
368 embryos (100%;  $n = 3$ ) (Table 3). Taken together, the results at E10.5 indicate that  
369 combined decreases in PDGFR $\alpha$  and PDGFR $\beta$  signaling lead to longer, more diffuse  
370 cNCC streams along the dorsal-ventral axis entering PA3 and PA4, with increased  
371 incidences of stream bifurcations and intermingling, perhaps indicative of defects in  
372 NCC directional migration.

373 Finally, to assess the extent of NCCs and their derivatives in the facial processes  
374 at E9.5 and E10.5, we quantified GFP expression in frontal views of the head in control  
375 *Pdgfra<sup>+/+</sup>;Pdgfrb<sup>+/+</sup>;Wnt1-Cre<sup>+Tg</sup>* embryos and among embryos with the four  
376 experimental genotypes. At E9.5, there were noticeable decreases in GFP intensity in  
377 the facial processes of experimental embryos (Figure 5B’-E’) compared to control  
378 embryos (Figure 5A’), particularly in the frontonasal and maxillary prominences. GFP  
379 fluorescence values were significantly decreased in *Pdgfra<sup>fl/fl</sup>;Pdgfrb<sup>+/fl</sup>;Wnt1-Cre<sup>+Tg</sup>*  
380 embryos ( $8.449 \times 10^8 \pm 7.256 \times 10^7$ ) compared to control *Pdgfra<sup>+/+</sup>;Pdgfrb<sup>+/+</sup>;Wnt1-*  
381 *Cre<sup>+Tg</sup>* embryos ( $2.079 \times 10^9 \pm 2.539 \times 10^8$ ) and double-heterozygous mutant embryos  
382 ( $1.373 \times 10^9 \pm 1.283 \times 10^8$ ). Moreover, while double-homozygous mutant embryos had  
383 higher GFP fluorescence values than *Pdgfra<sup>fl/fl</sup>;Pdgfrb<sup>+/fl</sup>;Wnt1-Cre<sup>+Tg</sup>* embryos, GFP

384 fluorescence was significantly decreased in double-homozygous mutant embryos  
385 ( $1.088 \times 10^9 \pm 1.022 \times 10^8$ ) compared to control *Pdgfra*<sup>+/+</sup>;*Pdgfrb*<sup>+/+</sup>;*Wnt1-Cre*<sup>+Tg</sup>  
386 embryos ( $2.079 \times 10^9 \pm 2.539 \times 10^8$ ). At E10.5, there was a marked decrease in GFP  
387 intensity in the facial processes of double-heterozygous mutant embryos (Figure 5H')  
388 compared to control *Pdgfra*<sup>+/+</sup>;*Pdgfrb*<sup>+/+</sup>;*Wnt1-Cre*<sup>+Tg</sup> embryos (Figure 5G') and a further  
389 decrease in *Pdgfra*<sup>fl/fl</sup>;*Pdgfrb*<sup>fl/fl</sup>;*Wnt1-Cre*<sup>+Tg</sup> embryos (Figure 5I'),  
390 *Pdgfra*<sup>fl/fl</sup>;*Pdgfrb*<sup>+/fl</sup>;*Wnt1-Cre*<sup>+Tg</sup> embryos (Figure 5J') and double-homozygous mutant  
391 embryos (Figure 5K'). Not surprisingly, GFP fluorescence values increased with the  
392 number of somite pairs, as NCC progenitors proliferate and differentiate over time  
393 (Figure 5L). However, for embryos with 31-35 somite pairs, relative fluorescence units  
394 decreased as additional alleles were ablated, with *Pdgfra*<sup>fl/fl</sup>;*Pdgfrb*<sup>+/fl</sup>;*Wnt1-Cre*<sup>+Tg</sup> and  
395 double-homozygous mutant embryos having the lowest, and essentially equal, GFP  
396 fluorescence values (Figure 5L). Collectively, our assessment of cNCC migration in the  
397 context of *Pdgfra* and *Pdgfrb* ablation demonstrates that signaling through these  
398 receptors contributes to several aspects of NCC activity, including stream size,  
399 directional migration and, ultimately, the extent of their derivatives in the facial  
400 prominences. Importantly, PDGFR $\alpha$  signaling appears to play a more predominant role  
401 in cNCC migration than PDGFR $\beta$ .

402

403 *PDGFR $\beta$  plays a more dominant role in proliferation of the facial mesenchyme than*  
404 *PDGFR $\alpha$*

405 We next examined levels of cell death amongst one control,  
406 *Pdgfra*<sup>+/fl</sup>;*Pdgfrb*<sup>+/fl</sup>;*Wnt1-Cre*<sup>+/+</sup>, and the four experimental genotypes containing the  
407 *Wnt1-Cre* transgene via terminal deoxynucleotidyl transferase-mediated dUTP nick end  
408 labeling (TUNEL). At E10.5, the percentage of TUNEL-positive cells was determined  
409 within the mesenchyme of the lateral and medial nasal processes, as well as the  
410 maxillary and mandibular prominences. The percentage of TUNEL-positive cells was  
411 higher in the medial nasal processes than the other locations at this timepoint for all  
412 genotypes (Figure 6A). Further, all experimental genotypes had a non-statistically  
413 significant decrease in the percentage of TUNEL-positive cells compared to the control  
414 genotype in both the lateral and medial nasal processes (Figure 6A). While the level of  
415 cell death did not vary significantly between the five genotypes within the maxillary and  
416 mandibular prominences, *Pdgfra*<sup>fl/fl</sup>;*Pdgfrb*<sup>+/fl</sup>;*Wnt1-Cre*<sup>+Tg</sup> embryos and double-  
417 heterozygous mutant embryos had the highest and second-highest percentages of  
418 TUNEL-positive cells, respectively, at these locations (Figure 6A). In the mandibular  
419 prominence, there was a trend for each of the experimental genotypes to have a higher  
420 percentage of TUNEL-positive cells when compared to control embryos (Figure 6A). At  
421 E13.5, the percentage of TUNEL-positive cells was determined within the mesenchyme  
422 of the nasal septum and anterior, middle and posterior secondary palatal shelves. The  
423 percentage of TUNEL-positive cells was higher in the nasal septum than in the  
424 secondary palatal shelves for all genotypes, consistent with the relatively high level of  
425 TUNEL-positive cells in the medial nasal processes three days earlier at E10.5. Two  
426 genotypes, *Pdgfra*<sup>+/fl</sup>;*Pdgfrb*<sup>fl/fl</sup>;*Wnt1-Cre*<sup>+Tg</sup> embryos and *Pdgfra*<sup>fl/fl</sup>;*Pdgfrb*<sup>+/fl</sup>;*Wnt1-*  
427 *Cre*<sup>+Tg</sup> embryos, had a non-statistically significant increase in the percentage of  
428 TUNEL-positive cells compared to the control genotype at this location (Figure 6B).  
429 While the level of cell death did not vary significantly between the five genotypes within

430 the secondary palatal shelves, there was a trend for each of the experimental  
431 genotypes to have a lower percentage of TUNEL-positive cells in the anterior palatal  
432 shelves when compared to control embryos (Figure 6B). In the middle palatal shelves,  
433 three genotypes, double-heterozygous mutant embryos, *Pdgfra*<sup>+/*fl*</sup>;*Pdgfrb*<sup>fl/fl</sup>;*Wnt1-Cre*<sup>+/*Tg*</sup>  
434 embryos and *Pdgfra*<sup>fl/fl</sup>;*Pdgfrb*<sup>+/*fl*</sup>;*Wnt1-Cre*<sup>+/*Tg*</sup> embryos, had a non-statistically significant  
435 increase in the percentage of TUNEL-positive cells compared to the control genotype  
436 (Figure 6B). Similarly, in the posterior palatal shelves, three genotypes, double-  
437 heterozygous mutant embryos, *Pdgfra*<sup>fl/fl</sup>;*Pdgfrb*<sup>+/*fl*</sup>;*Wnt1-Cre*<sup>+/*Tg*</sup> embryos and double-  
438 homozygous mutant embryos, had a non-statistically significant increase in the  
439 percentage of TUNEL-positive cells compared to the control genotype (Figure 6B).  
440 Despite these modest trends, the combined TUNEL assay results demonstrate that  
441 neither PDGFR $\alpha$  nor PDGFR $\beta$  signaling plays a critical role in cNCC-derived facial  
442 mesenchyme survival during mid-gestation.

443 We similarly examined levels of cell proliferation amongst one control,  
444 *Pdgfra*<sup>+/*fl*</sup>;*Pdgfrb*<sup>+/*fl*</sup>;*Wnt1-Cre*<sup>+/*+*</sup>, and the four experimental genotypes containing the  
445 *Wnt1-Cre* transgene via Ki67 immunofluorescence analysis. At E10.5, the percentage of  
446 Ki67-positive cells was determined within the mesenchyme of the lateral and medial  
447 nasal processes, as well as the maxillary and mandibular prominences. The percentage  
448 of Ki67-positive cells was highest in the lateral nasal processes and lowest in the  
449 mandibular prominence for all genotypes (Figure 7A). The level of cell proliferation did  
450 not vary significantly between the five genotypes at any of the locations examined, with  
451 the exception of a significant increase in the percentage of Ki67-positive cells in the  
452 lateral nasal processes of double-homozygous mutant embryos ( $4.704 \pm 0.4459$ )  
453 compared to *Pdgfra*<sup>fl/fl</sup>;*Pdgfrb*<sup>+/*fl*</sup>;*Wnt1-Cre*<sup>+/*Tg*</sup> embryos ( $3.004 \pm 0.3356$ ,  $p = 0.0420$ )  
454 (Figure 7A). All experimental genotypes had a non-statistically significant decrease in  
455 the percentage of Ki67-positive cells compared to the control genotype in the maxillary  
456 prominences (Figure 7A). Interestingly, the percentage of Ki67-positive cells was  
457 consistently lower in *Pdgfra*<sup>+/*fl*</sup>;*Pdgfrb*<sup>fl/fl</sup>;*Wnt1-Cre*<sup>+/*Tg*</sup> embryos and  
458 *Pdgfra*<sup>fl/fl</sup>;*Pdgfrb*<sup>+/*fl*</sup>;*Wnt1-Cre*<sup>+/*Tg*</sup> embryos than double-homozygous mutant embryos at  
459 all locations at this timepoint (Figure 7A). As above with the TUNEL analysis, at E13.5,  
460 the percentage of Ki67-positive cells was determined within the mesenchyme of the  
461 nasal septum and anterior, middle and posterior secondary palatal shelves. The  
462 percentage of Ki67-positive cells was consistently lower in the nasal septum than the  
463 secondary palatal shelves (Figure 7B). While the level of proliferation did not vary  
464 significantly between the five genotypes in the nasal septum and along the anterior-  
465 posterior axis of the secondary palatal shelves, there were trends for each of the  
466 experimental genotypes to have a lower percentage of Ki67-positive cells in the nasal  
467 septum and middle palatal shelves and a higher percentage of Ki67-positive cells in the  
468 posterior palatal shelves when compared to these same locations in control embryos  
469 (Figure 7B). Intriguingly, *Pdgfra*<sup>+/*fl*</sup>;*Pdgfrb*<sup>fl/fl</sup>;*Wnt1-Cre*<sup>+/*Tg*</sup> embryos had a consistently  
470 lower percentage of Ki67-positive cells in the nasal septum and throughout the  
471 secondary palatal shelves than *Pdgfra*<sup>fl/fl</sup>;*Pdgfrb*<sup>+/*fl*</sup>;*Wnt1-Cre*<sup>+/*Tg*</sup> embryos (Figure 7B).  
472 These findings indicate that both PDGFR $\alpha$  and PDGFR $\beta$  promote cell proliferation in  
473 the craniofacial mesenchyme, with PDGFR $\beta$  potentially playing a more predominant  
474 role in this context.

475 We subsequently sought to determine the individual contribution of PDGFR $\alpha$  and  
476 PDGFR $\beta$  to proliferation of the craniofacial mesenchyme and to distinguish any  
477 potential proliferation defects from more wide-spread phenotypes observed upon  
478 ablation of *Pdgfra* or *Pdgfrb* in the NCC lineage. To do this, primary MEPM cells were  
479 dissected from E13.5 control (*Pdgfra*<sup>+fl</sup>;*Wnt1-Cre*<sup>+Tg</sup> or *Pdgfrb*<sup>+fl</sup>;*Wnt1-Cre*<sup>+Tg</sup>) and  
480 conditional knock-out (*Pdgfra*<sup>fl/fl</sup>;*Wnt1-Cre*<sup>+Tg</sup> or *Pdgfrb*<sup>fl/fl</sup>;*Wnt1-Cre*<sup>+Tg</sup>) littermate  
481 embryos for use in cell growth assays (Figure 8A). Primary MEPM cells are a faithful  
482 surrogate for embryonic facial mesenchyme, as wild-type cells uniformly express both  
483 PDGFR $\alpha$  and PDGFR $\beta$ , as well as numerous additional markers of palatal  
484 mesenchyme cells *in vivo*, and are responsive to stimulation with PDGF-AA, PDGF-BB  
485 and PDGF-DD ligand (He and Soriano, 2013; Fantauzzo and Soriano, 2014, 2016,  
486 2017; Vasudevan and Soriano, 2014; Vasudevan et al., 2015). Even after a single day  
487 in growth medium containing 10% FBS, control *Pdgfrb*<sup>+fl</sup>;*Wnt1-Cre*<sup>+Tg</sup> cells ( $0.1077 \pm$   
488  $0.01233$  arbitrary units (AU)) (Figure 8C) had grown about half as much as control  
489 *Pdgfra*<sup>+fl</sup>;*Wnt1-Cre*<sup>+Tg</sup> cells ( $0.2217 \pm 0.07322$  AU) (Figure 8B). All cells grown in  
490 starvation medium containing 0.1% FBS, both control and conditional knock-out,  
491 immediately proliferated less than cells of the same genotypes grown in growth medium  
492 (Figure 8B,C). Importantly, conditional knock-out cells consistently fared worse than  
493 their control counterparts in both growth and starvation medium, though this difference  
494 was more pronounced in *Pdgfrb*<sup>+fl</sup>;*Wnt1-Cre*<sup>+Tg</sup> versus *Pdgfrb*<sup>fl/fl</sup>;*Wnt1-Cre*<sup>+Tg</sup> cells  
495 following six days in culture. At this time, control *Pdgfra*<sup>+fl</sup>;*Wnt1-Cre*<sup>+Tg</sup> cells cultured in  
496 growth medium ( $0.8773 \pm 0.08867$  AU) had proliferated approximately 1.8 times the  
497 extent of *Pdgfra*<sup>fl/fl</sup>;*Wnt1-Cre*<sup>+Tg</sup> cells ( $0.4885 \pm 0.03203$  AU,  $p = 0.0357$ ) (Figure 8B),  
498 while control *Pdgfrb*<sup>+fl</sup>;*Wnt1-Cre*<sup>+Tg</sup> cells ( $0.5897 \pm 0.03588$  AU) cultured in growth  
499 medium had an absorbance reading roughly 2.5 times that of *Pdgfrb*<sup>fl/fl</sup>;*Wnt1-Cre*<sup>+Tg</sup>  
500 cells ( $0.2394 \pm 0.05482$  AU,  $p = 0.0018$ ) (Figure 8C). Similarly, control *Pdgfra*<sup>+fl</sup>;*Wnt1-*  
501 *Cre*<sup>+Tg</sup> cells cultured in starvation medium ( $0.2953 \pm 0.06842$  AU) had proliferated  
502 approximately 1.5 times the extent of *Pdgfra*<sup>fl/fl</sup>;*Wnt1-Cre*<sup>+Tg</sup> cells ( $0.2013 \pm 0.01605$  AU,  
503  $p = 0.3012$ ) (Figure 8B), while control *Pdgfrb*<sup>+fl</sup>;*Wnt1-Cre*<sup>+Tg</sup> cells ( $0.2047 \pm 0.009821$   
504 AU) cultured in growth medium had an absorbance reading roughly 1.9 times that of  
505 *Pdgfrb*<sup>fl/fl</sup>;*Wnt1-Cre*<sup>+Tg</sup> cells ( $0.1084 \pm 0.01588$  AU,  $p = 0.0022$ ) (Figure 8C). Further,  
506 none of the PDGF-AA, PDGF-BB nor PDGF-DD ligand treatments led to significantly  
507 more growth than that observed in the absence of ligand for cells of all genotypes  
508 cultured in both growth and starvation medium (Figure 8B,C), with the exception of  
509 control *Pdgfrb*<sup>+fl</sup>;*Wnt1-Cre*<sup>+Tg</sup> cells cultured in starvation medium in the absence  
510 ( $0.2047 \pm 0.009821$  AU) or presence of PDGF-AA ligand treatment ( $0.1580 \pm 0.01286$   
511 AU,  $p = 0.0486$ ) (Figure 8C). Interestingly, PDGF-AA ligand treatment, which has been  
512 shown to exclusively activate PDGFR $\alpha$  homodimer signaling in this context and not  
513 PDGFR $\alpha/\beta$  heterodimer nor PDGFR $\beta$  homodimer signaling (Fantauzzo and Soriano,  
514 2017), consistently resulted in less cell growth than PDGF-BB and/or PDGF-DD ligand  
515 treatments, though these differences were not statistically significant (Figure 8B,C).  
516 Finally, whereas control *Pdgfra*<sup>+fl</sup>;*Wnt1-Cre*<sup>+Tg</sup> cells versus *Pdgfra*<sup>fl/fl</sup>;*Wnt1-Cre*<sup>+Tg</sup> cells  
517 did not exhibit a significant difference in proliferation upon ligand treatment when  
518 cultured in growth or starvation medium, control *Pdgfrb*<sup>+fl</sup>;*Wnt1-Cre*<sup>+Tg</sup> cells significantly  
519 out-performed *Pdgfrb*<sup>fl/fl</sup>;*Wnt1-Cre*<sup>+Tg</sup> cells when cultured in growth medium in response

520 to PDGF-AA ligand treatment ( $0.5167 \pm 0.01913$  versus  $0.2912 \pm 0.07210$ ,  $p = 0.0332$ )  
521 and when cultured in starvation medium in response to PDGF-DD ligand treatment  
522 ( $0.1770 \pm 0.005859$  versus  $0.1196 \pm 0.02084$ ,  $p = 0.0493$ ) (Figure 8B,C). Taken  
523 together, these results confirm the Ki67 immunofluorescence analyses above and  
524 reveal that PDGFR $\beta$  plays a more dominant role in proliferation of the facial  
525 mesenchyme than PDGFR $\alpha$ .

526

## 527 Discussion

528

529 Here we report the first detailed phenotypic characterization of mouse embryos in  
530 which both *Pdgfra* and *Pdgfrb* are ablated in the NCC lineage. Our results reveal that  
531 the two receptors genetically interact in this lineage during embryogenesis, as  
532 phenotypes observed in an allelic series of mutant embryos often worsened with the  
533 addition of conditional alleles. We characterized defects in craniofacial development at  
534 mid-gestation resulting from combined loss of *Pdgfra* and *Pdgfrb*, including incidences  
535 of facial clefting, blebbing and hemorrhaging. These results confirm the phenotypes we  
536 observed from mid-to-late-gestation upon combining the constitutive *Pdgfra*<sup>P13K</sup> allele  
537 together with the conditional *Pdgfrb*<sup>fl</sup> allele and the *Wnt1-Cre* driver (Fantauzzo and  
538 Soriano, 2016) and significantly extend those findings by exploring the cellular  
539 mechanisms through which these phenotypes arise. The defects observed here were  
540 shown to stem from decreased cNCC stream size and aberrant cNCC directional  
541 migration, as well as reduced proliferation of the facial mesenchyme upon combined  
542 decreases in PDGFR $\alpha$  and PDGFR $\beta$  signaling. These findings are the first to  
543 demonstrate a role for PDGFR $\beta$  in regulating each of these processes in the developing  
544 mouse embryo. Importantly, we found that PDGFR $\alpha$  plays a predominant role in cNCC  
545 migration while PDGFR $\beta$  primarily contributes to proliferation of the facial mesenchyme.

546 Our E13.5 gross morphology results indicate that one or both of the conditional  
547 alleles used in this study are hypomorphic, as facial blebbing and facial hemorrhaging  
548 were detected in a subset of embryos upon combination of at least 3 out of 4 conditional  
549 alleles in the absence of the *Wnt1-Cre* transgene. While mice heterozygous for a *Pdgfra*  
550 null allele are viable (Soriano, 1997), *Pdgfra*<sup>fl/-</sup> embryos are not, exhibiting multiple  
551 phenotypes such as spina bifida and cleft palate (Tallquist and Soriano, 2003; McCarthy  
552 et al., 2016). Further, *Pdgfra*<sup>fl/fl</sup> mice in our own colony, which are maintained through  
553 homozygous intercrosses, generate small litters (average litter size of 4.2 pups at 5-10  
554 days after birth compared to an average of 5.8 pups for wild-type 129S4 litters;  $p =$   
555  $0.0013$ ) and have shortened snouts with a pigment defect at the facial midline (data not  
556 shown). It has been hypothesized that these hypomorphic phenotypes arise due to the  
557 presence of a neomycin resistance cassette in the floxed allele that reduces expression  
558 of *Pdgfra* (Tallquist and Soriano, 2003). Hypomorphic phenotypes have not previously  
559 been attributed to the *Pdgfrb*<sup>fl</sup> allele, and *Pdgfrb*<sup>fl/fl</sup> mice in our colony, which are also  
560 maintained through homozygous intercrosses, give birth to litters of expected sizes  
561 (average litter size of 6.2 pups at 5-10 days after birth compared to an average of 5.8  
562 pups for wild-type 129S4 litters;  $p = 0.2998$ ).

563 Interestingly, in several parameters examined here, including distance between  
564 the nasal pits at E10.5, heights and lengths of cNCC streams entering PA2, GFP  
565 intensity in the facial processes at E9.5 and the percentage of Ki67-positive cells in the

566 lateral nasal processes at E10.5, the phenotype of *Pdgfra*<sup>fl/fl</sup>;*Pdgfrb*<sup>+fl</sup>;*Wnt1-Cre*<sup>+Tg</sup>  
567 embryos was more severe than that of double-homozygous mutant embryos. This result  
568 is contrary to our previous observations in which *Pdgfra*<sup>PI3K/PI3K</sup>;*Pdgfrb*<sup>+fl</sup>;*Wnt1-Cre*<sup>+Tg</sup>  
569 embryos did not exhibit facial clefting at E13.5, while this phenotype was fully penetrant  
570 in *Pdgfra*<sup>PI3K/PI3K</sup>;*Pdgfrb*<sup>fl/fl</sup>;*Wnt1-Cre*<sup>+Tg</sup> embryos (Fantauzzo and Soriano, 2016). The  
571 most likely explanation for this finding is that reduced, but not absent, PDGFR $\beta$   
572 signaling has a negative effect on cNCC activity and subsequent facial development in  
573 a context in which PDGFR $\alpha$  signaling is completely abolished, as observed here.  
574 Further studies will be required to determine the mechanism(s) by which this  
575 phenomenon occurs.

576 In *Xenopus*, *pdgfra* is expressed by pre-migratory and migratory cNCCs, while its  
577 ligand *pdgfa* is expressed in pre-migratory NCCs and the tissues surrounding migratory  
578 NCCs (Bahm et al., 2017). Functional studies revealed dual roles for PDGF-A-  
579 dependent PDGFR $\alpha$  signaling in NCC development. During early NCC migration,  
580 PI3K/Akt-mediated PDGFR $\alpha$  signaling cell autonomously upregulates N-cadherin to  
581 promote contact inhibition of locomotion and cell dispersion. Following initiation of the  
582 epithelial-to-mesenchymal transition, migrating NCCs chemotax towards PDGF-A ligand  
583 in the surrounding tissue, resulting in directional migration (Bahm et al., 2017). The  
584 ligand *pdgfb* is also expressed in tissues adjacent to migrating NCCs in *Xenopus*  
585 embryos (Giannetti et al., 2016) and knock-down of this ligand results in impaired cNCC  
586 migration and defective development of the craniofacial cartilages and cranial nerves in  
587 a subset of morpholino-injected embryos (Corsinovi et al., 2019). In zebrafish, *pdgfra* is  
588 similarly expressed by pre-migratory and migratory cNCCs, while its ligand *pdgfaa* is  
589 correspondingly expressed at early stages in the midbrain and later in the oral ectoderm  
590 (Eberhart et al., 2008). A hypomorphic zebrafish mutant of *pdgfra* exhibits palatal  
591 clefting and a shortened neurocrania due to defective cNCC migration (Eberhart et al.,  
592 2008; McCarthy et al., 2016). *Pdgfrb* is also expressed by migratory cNCCs in zebrafish  
593 and the phenotypes observed in *pdgfra* mutants are exacerbated in double  
594 *pdgfra*;*pdgfrb* mutant fish in which cNCCs fail to properly condense in the maxillary  
595 domain (McCarthy et al., 2016). In contrast to a previous study in which cNCC migration  
596 was reportedly unperturbed upon combined ablation of *Pdgfra* and *Pdgfrb* in the murine  
597 NCC lineage (Richarte et al., 2007), our results confirm the findings in lower vertebrates  
598 that both receptors play a role in NCC migration and that aspects of the phenotype  
599 observed upon conditional ablation of *Pdgfra* in the NCC lineage are exacerbated in  
600 double-homozygous mutant embryos.

601 In summary, our findings provide insight into the distinct mechanisms by which  
602 PDGFR $\alpha$  and PDGFR $\beta$  signaling regulate cNCC activity and subsequent craniofacial  
603 development in a mammalian system. Future studies will seek to identify the  
604 intracellular signaling molecules and gene expression responses that mediate the  
605 effects of these receptors on migration and proliferation.

## 606 607 **Conflict of Interest**

608  
609 The authors declare that the research was conducted in the absence of any commercial  
610 or financial relationships that could be construed as a potential conflict of interest.

611

612 **Author Contributions**

613

614 KF conceived and designed the study. JM, RL and KF performed experimentation. JM  
615 and KF analyzed data. KF wrote the original draft of the manuscript, which was revised  
616 and edited in an iterative process with JM.

617

618 **Funding**

619

620 This work was supported by National Institutes of Health/National Institute of Dental and  
621 Craniofacial Research (NIH/NIDCR) grants R03DE025263, R01DE027689 and  
622 K02DE028572 (to K.A.F).

623

624 **Acknowledgements**

625

626 We are grateful to Damian Garno and Elliott Brooks for technical assistance. We thank  
627 members of the Fantauzzo laboratory for their helpful discussions and critical comments  
628 on the manuscript.

629

630 **References**

631

632 Bahm, I., Barriga, E. H., Frolov, A., Theveneau, E., Frankel, P., and Mayor, R. (2017).  
633 PDGF controls contact inhibition of locomotion by regulating N-cadherin during  
634 neural crest migration. *Development* 144, 2456–2468. doi:10.1242/dev.147926.

635 Boström, H., Willetts, K., Pekny, M., Levéen, P., Lindahl, P., Hedstrand, H., et al.  
636 (1996). PDGF-A signaling is a critical event in lung alveolar myofibroblast  
637 development and alveogenesis. *Cell* 85, 863–873. doi:10.1016/S0092-  
638 8674(00)81270-2.

639 Bush, J. O., and Jiang, R. (2012). Palatogenesis: morphogenetic and molecular  
640 mechanisms of secondary palate development. *Development* 139, 828–828.  
641 doi:10.1242/dev.079152.

642 Bush, J. O., and Soriano, P. (2010). Ephrin-B1 forward signaling regulates craniofacial  
643 morphogenesis by controlling cell proliferation across Eph-ephrin boundaries.  
644 *Genes Dev.* 24, 2068–2080. doi:10.1101/gad.1963210.

645 Choi, S. J., Marazita, M. L., Hart, P. S., Sulima, P. P., Field, L. L., McHenry, T. G., et al.  
646 (2009). The PDGF-C regulatory region SNP rs28999109 decreases promoter  
647 transcriptional activity and is associated with CL/P. *Eur. J. Hum. Genet.* 17, 774–  
648 784. doi:10.1038/ejhg.2008.245.

649 Corsinovi, D., Giannetti, K., Cericola, A., Naef, V., and Ori, M. (2019). PDGF-B: The  
650 missing piece in the mosaic of PDGF family role in craniofacial development. *Dev.*  
651 *Dyn.* 248, 603–612. doi:10.1002/dvdy.47.

652 Danielian, P. S., Muccino, D., Rowitch, D. H., Michael, S. K., and McMahon, A. P.  
653 (1998). Modification of gene activity in mouse embryos in utero by a tamoxifen-  
654 inducible form of Cre recombinase. *Curr. Biol.* 8, 1323–1326. doi:10.1016/S0960-  
655 9822(07)00562-3.

656 Ding, H., Wu, X., Boström, H., Kim, I., Wong, N., Tsoi, B., et al. (2004). A specific  
657 requirement for PDGF-C in palate formation and PDGFR-alpha signaling. *Nat.*

- 658 *Genet.* 36, 1111–1116. doi:10.1038/ng1415.
- 659 Ding, H., Wu, X., Kim, I., Tam, P. P., Koh, G. Y., and Nagy, A. (2000). The mouse *Pdgfc*  
660 gene: dynamic expression in embryonic tissues during organogenesis. *Mech. Dev.*  
661 96, 209–213. doi:10.1016/S0925-4773(00)00425-1.
- 662 Eberhart, J. K., He, X., Swartz, M. E., Yan, Y. L., Song, H., Boling, T. C., et al. (2008).  
663 MicroRNA *Mirn140* modulates *Pdgf* signaling during palatogenesis. *Nat. Genet.* 40,  
664 290–298. doi:10.1038/ng.82.
- 665 Fantauzzo, K. A., and Soriano, P. (2014). PI3K-mediated PDGFR $\alpha$  signaling regulates  
666 survival and proliferation in skeletal development through p53-dependent  
667 intracellular pathways. *Genes Dev.* 28, 1005–1017. doi:10.1101/gad.238709.114.
- 668 Fantauzzo, K. A., and Soriano, P. (2016). PDGFR $\beta$  regulates craniofacial development  
669 through homodimers and functional heterodimers with PDGFR $\alpha$ . *Genes Dev.* 30,  
670 2443–2458. doi:10.1101/gad.288746.116.
- 671 Fantauzzo, K. A., and Soriano, P. (2017). Generation of an immortalized mouse  
672 embryonic palatal mesenchyme cell line. *PLoS One* 12, e0179078.  
673 doi:10.1371/journal.pone.0179078.
- 674 Giannetti, K., Corsinovi, D., Rossino, C., Appolloni, I., Malatesta, P., and Ori, M. (2016).  
675 Platelet derived growth factor B gene expression in the *Xenopus laevis* developing  
676 central nervous system. *Int. J. Dev. Biol.* 60, 175–179. doi:10.1387/ijdb.160045mo.
- 677 Hamilton, T. G., Klinghoffer, R. A., Corrin, P. D., and Soriano, P. (2003). Evolutionary  
678 divergence of platelet-derived growth factor alpha receptor signaling mechanisms.  
679 *Mol. Cell. Biol.* 23, 4013–4025. doi:10.1128/MCB.23.11.4013-4025.2003.
- 680 He, F., and Soriano, P. (2013). A Critical Role for PDGFR $\alpha$  Signaling in Medial Nasal  
681 Process Development. *PLoS Genet.* 9, e1003851.  
682 doi:10.1371/journal.pgen.1003851.
- 683 He, F., and Soriano, P. (2015). *Sox10ERT2CreERT2* mice enable tracing of distinct  
684 neural crest cell populations. *Dev. Dyn.* 244, 1394–1403. doi:10.1002/dvdy.24320.
- 685 Heldin, C. H., and Westermark, B. (1999). Mechanism of action and in vivo role of  
686 platelet-derived growth factor. *Physiol. Rev.* 79, 1283–1316.  
687 doi:10.1152/physrev.1999.79.4.1283.
- 688 Johnston, J. J., Sanchez-Contreras, M. Y., Keppler-Noreuil, K. M., Sapp, J., Crenshaw,  
689 M., Finch, N. C. A., et al. (2015). A Point Mutation in PDGFRB Causes Autosomal-  
690 Dominant Penttinen Syndrome. *Am. J. Hum. Genet.* 97, 465–474.  
691 doi:10.1016/j.ajhg.2015.07.009.
- 692 Klinghoffer, R., A., Hamilton, T. G., Hoch, R., and Soriano, P. (2002). An allelic series at  
693 the PDGF $\alpha$ R locus indicates unequal contributions of distinct signaling pathways  
694 during development. *Dev. Cell* 2, 103–113. doi:10.1016/S1534-5807(01)00103-4.
- 695 Levéen, P., Pekny, M., Gebre-Medhin, S., Swolin, B., Larsson, E., and Betsholtz, C.  
696 (1994). Mice deficient for PDGF B show renal, cardiovascular, and hematological  
697 abnormalities. *Genes Dev.* 8, 1875–1887. doi:10.1101/gad.8.16.1875.
- 698 Mayor, R., and Theveneau, E. (2013). The neural crest. *Development* 140, 2247–2251.  
699 doi:10.1242/dev.091751.
- 700 McCarthy, N., Liu, J. S., Richarte, A. M., Eskiocak, B., Lovely, C. Ben, Tallquist, M. D.,  
701 et al. (2016). *Pdgfra* and *Pdgfrb* genetically interact during craniofacial  
702 development. *Dev. Dyn.* 245, 641–652. doi:10.1002/dvdy.24403.
- 703 Morrison-Graham, K., Schatteman, G. C., Bork, T., Bowen-Pope, D. F., and Weston, J.



- 704 a (1992). A PDGF receptor mutation in the mouse (Patch) perturbs the  
705 development of a non-neuronal subset of neural crest-derived cells. *Development*  
706 115, 133–142.
- 707 Muzumdar, M. D., Tasic, B., Miyamichi, K., Li, N., and Luo, L. (2007). A global double-  
708 fluorescent cre reporter mouse. *Genesis* 45, 593–605. doi:10.1002/dvg.20335.
- 709 Orr-Urtreger, A., and Lonai, P. (1992). Platelet-derived growth factor-A and its receptor  
710 are expressed in separate, but adjacent cell layers of the mouse embryo.  
711 *Development* 115, 1045–1058.
- 712 Parker, S. E., Mai, C. T., Canfield, M. A., Rickard, R., Wang, Y., Meyer, R. E., et al.  
713 (2010). Updated national birth prevalence estimates for selected birth defects in the  
714 United States, 2004-2006. *Birth Defects Res. Part A - Clin. Mol. Teratol.* 88, 1008–  
715 1016. doi:10.1002/bdra.20735.
- 716 Rattanasopha, S., Tongkobetch, S., Srichomthong, C., Siriwan, P., Suphapeetiporn,  
717 K., and Shotelersuk, V. (2012). PDGFRa mutations in humans with isolated cleft  
718 palate. *Eur. J. Hum. Genet.* 20, 1058–1062. doi:10.1038/ejhg.2012.55.
- 719 Richarte, A. M., Mead, H. B., and Tallquist, M. D. (2007). Cooperation between the  
720 PDGF receptors in cardiac neural crest cell migration. *Dev. Biol.* 306, 785–796.  
721 doi:10.1016/j.ydbio.2007.04.023.
- 722 Sandell, L. L., Kurosaka, H., and Trainor, P. A. (2012). Whole mount nuclear fluorescent  
723 imaging: Convenient documentation of embryo morphology. *Genesis* 50, 844–850.  
724 doi:10.1002/dvg.22344.
- 725 Schmahl, J., Rizzolo, K., and Soriano, P. (2008). The PDGF signaling pathway controls  
726 multiple steroid-producing lineages. *Genes Dev.* 22, 3255–3267.  
727 doi:10.1101/gad.1723908.
- 728 Soriano, P. (1994). Abnormal kidney development and hematological disorders in  
729 PDGF beta-receptor mutant mice. *Genes Dev.* 8, 1888–1896.  
730 doi:10.1101/gad.8.16.1888.
- 731 Soriano, P. (1997). The PDGF alpha receptor is required for neural crest cell  
732 development and for normal patterning of the somites. *Development* 124, 2691–  
733 2700.
- 734 Takenouchi, T., Yamaguchi, Y., Tanikawa, A., Kosaki, R., Okano, H., and Kosaki, K.  
735 (2015). Novel overgrowth syndrome phenotype due to recurrent de novo PDGFRB  
736 mutation. *J. Pediatr.* 166, 483–486. doi:10.1016/j.jpeds.2014.10.015.
- 737 Tallquist, M. D., and Soriano, P. (2003). Cell autonomous requirement for PDGFRalpha  
738 in populations of cranial and cardiac neural crest cells. *Development* 130, 507–518.  
739 doi:10.1242/dev.00241.
- 740 Trainor, P. a (2005). Specification of neural crest cell formation and migration in mouse  
741 embryos. *Semin. Cell Dev. Biol.* 16, 683–693. doi:10.1016/j.semcd.2005.06.007.
- 742 Vasudevan, H. N., Mazot, P., He, F., and Soriano, P. (2015). Receptor tyrosine kinases  
743 modulate distinct transcriptional programs by differential usage of intracellular  
744 pathways. *Elife* 4, e07186. doi:10.7554/eLife.07186.
- 745 Vasudevan, H. N. N., and Soriano, P. (2014). SRF Regulates Craniofacial Development  
746 through Selective Recruitment of MRTF Cofactors by PDGF Signaling. *Dev. Cell*  
747 31, 332–344. doi:10.1016/j.devcel.2014.10.005.

748  
749 **Figure Legends**

750

751 **Figure 1.** Ablation of *Pdgfra* and *Pdgfrb* in the NCC lineage leads to increased  
752 distances between the nasal pits at mid-gestation. Scatter dot plot depicting the  
753 distance ( $\mu\text{m}$ ) between nasal pits across five genotypes at E10.5. Data are presented  
754 as mean  $\pm$  SEM. \*,  $p < 0.05$ ; \*\*,  $p < 0.01$ ; \*\*\*,  $p < 0.001$ ; \*\*\*\*,  $p < 0.0001$ .

755

756 **Figure 2.** Ablation of *Pdgfra* and *Pdgfrb* in the NCC lineage results in facial clefting,  
757 blebbing and hemorrhaging at E13.5. **(A-H')** Gross morphology of E13.5 embryos  
758 resulting from intercrosses of *Pdgfra<sup>fl/fl</sup>;Pdgfrb<sup>fl/fl</sup>* mice with *Pdgfra<sup>+fl</sup>;Pdgfrb<sup>+fl</sup>;Wnt1-*  
759 *Cre<sup>+Tg</sup>* mice as viewed laterally **(A-H)** and frontally **(A'-H')**. *Pdgfra<sup>fl/fl</sup>;Pdgfrb<sup>+fl</sup>;Wnt1-*  
760 *Cre<sup>+Tg</sup>* and double-homozygous mutant embryos exhibited an overt facial cleft (red  
761 arrow). Facial blebbing (green arrowheads) and facial hemorrhaging (red arrowheads)  
762 were also detected among embryos possessing a variety of allele combinations.

763

764 **Figure 3.** Ablation of *Pdgfra* and *Pdgfrb* in the NCC lineage leads to cNCC streams  
765 entering PA1 and PA2 that are reduced in size at E9.5. **(A-E')** Lateral, whole-mount  
766 fluorescence images of DAPI **(A-E)** and GFP **(A'-E')** expression across five genotypes  
767 at E9.5. **(B''-E'')** Zoomed-in images of GFP expression in cNCC streams (outlined by  
768 dotted lines) entering PA1 and PA2. PA1, pharyngeal arch 1; PA2, pharyngeal arch 2.  
769 **(F)** Scatter dot plot depicting the anterior-posterior heights and dorsal-ventral lengths  
770 ( $\mu\text{m}$ ) of cNCC streams entering PA1 and PA2 across five genotypes at E9.5. Data are  
771 presented as mean  $\pm$  SEM. \*,  $p < 0.05$ .

772

773 **Figure 4.** Ablation of *Pdgfra* and *Pdgfrb* in the NCC lineage results in longer, more  
774 diffuse cNCC streams along the dorsal-ventral axis entering PA3 and PA4 at E10.5,  
775 with increased incidences of stream bifurcations and intermingling. **(A-E')** Lateral,  
776 whole-mount fluorescence images of DAPI **(A-E)** and GFP **(A'-E')** expression across  
777 five genotypes at E10.5. **(B''-E'')** Zoomed-in images of GFP expression in cNCC  
778 streams (outlined by dotted lines) entering PA3 and PA4. Arrowhead indicates an  
779 example of a bifurcated cNCC stream. **(F)** Scatter dot plot depicting the anterior-  
780 posterior heights and dorsal-ventral lengths ( $\mu\text{m}$ ) of cNCC streams entering PA3 and  
781 PA4 across five genotypes at E10.5. Data are presented as mean  $\pm$  SEM.

782

783 **Figure 5.** Ablation of *Pdgfra* and *Pdgfrb* in the NCC lineage leads to decreased NCC  
784 derivatives in the facial prominences at mid-gestation. **(A-K')** Frontal, whole-mount  
785 fluorescence images of DAPI **(A-E, G-K)** and GFP **(A'-E', G'-K')** expression across five  
786 genotypes at E9.5 **(A-E')** and E10.5 **(G-K')**. **(F)** Scatter dot plot depicting GFP  
787 fluorescence intensity across five genotypes at E9.5. Data are presented as mean  $\pm$   
788 SEM. \*,  $p < 0.05$ . **(L)** Scatter dot plot depicting GFP fluorescence intensity across five  
789 genotypes at E10.5. Data are presented as mean  $\pm$  SEM. Colors correspond to number  
790 of somite pairs in assayed embryos.

791

792 **Figure 6.** Neither PDGFR $\alpha$  nor PDGFR $\beta$  signaling plays a critical role in cNCC-derived  
793 facial mesenchyme survival during mid-gestation. **(A)** Scatter dot plot depicting the  
794 percentage of TUNEL-positive cells in the nasal processes and facial prominences  
795 across five genotypes at E10.5. Data are presented as mean  $\pm$  SEM. Shades

796 correspond to independent experiments across three biological replicates. LNP, lateral  
 797 nasal process; MNP, medial nasal process; MxP, maxillary prominence; MdP,  
 798 mandibular prominence. **(B)** Scatter dot plot depicting the percentage of TUNEL-  
 799 positive cells in the nasal septum and secondary palatal shelves across five genotypes  
 800 at E13.5. Data are presented as mean  $\pm$  SEM. Shades correspond to independent  
 801 experiments across three biological replicates. NS, nasal septum; aPS, anterior  
 802 secondary palatal shelves; mPS, middle secondary palatal shelves; pPS, posterior  
 803 secondary palatal shelves.

804  
 805 **Figure 7.** PDGFR $\beta$  plays a more dominant role in proliferation of the craniofacial  
 806 mesenchyme than PDGFR $\alpha$  during mid-gestation. **(A)** Scatter dot plot depicting the  
 807 percentage of Ki67-positive cells in the nasal processes and facial prominences across  
 808 five genotypes at E10.5. Data are presented as mean  $\pm$  SEM. \*,  $p < 0.05$ . Shades  
 809 correspond to independent experiments across three biological replicates. LNP, lateral  
 810 nasal process; MNP, medial nasal process; MxP, maxillary prominence; MdP,  
 811 mandibular prominence. **(B)** Scatter dot plot depicting the percentage of Ki67-positive  
 812 cells in the nasal septum and secondary palatal shelves across five genotypes at E13.5.  
 813 Data are presented as mean  $\pm$  SEM. Shades correspond to independent experiments  
 814 across three biological replicates. NS, nasal septum; aPS, anterior secondary palatal  
 815 shelves; mPS, middle secondary palatal shelves; pPS, posterior secondary palatal  
 816 shelves.

817  
 818 **Figure 8.** PDGFR $\beta$  plays a more dominant role in proliferation of primary MEPM cells  
 819 than PDGFR $\alpha$ . **(A)** Experimental design for cell growth assays. **(B)** Line graph depicting  
 820 absorbance values at 590 nm in *Pdgfra*<sup>+fl</sup>;*Wnt1-Cre*<sup>+Tg</sup> versus *Pdgfra*<sup>fl/fl</sup>;*Wnt1-Cre*<sup>+Tg</sup>  
 821 primary MEPM cells across conditions. Data are presented as mean  $\pm$  SEM. \*,  $p < 0.05$ ;  
 822 \*\*,  $p < 0.01$ ; \*\*\*,  $p < 0.001$ . **(C)** Line graph depicting absorbance values at 590 nm in  
 823 *Pdgfrb*<sup>+fl</sup>;*Wnt1-Cre*<sup>+Tg</sup> versus *Pdgfrb*<sup>fl/fl</sup>;*Wnt1-Cre*<sup>+Tg</sup> primary MEPM cells across  
 824 conditions. Data are presented as mean  $\pm$  SEM. \*,  $p < 0.05$ ; \*\*,  $p < 0.01$ ; \*\*\*,  $p < 0.001$ .

825  
 826 **Tables**  
 827

828 **Table 1.** Phenotypes of E10.5 embryos from intercrosses of *Pdgfra*<sup>fl/fl</sup>;*Pdgfrb*<sup>fl/fl</sup> mice  
 829 with *Pdgfra*<sup>+fl</sup>;*Pdgfrb*<sup>+fl</sup>;*Wnt1-Cre*<sup>+Tg</sup> mice.

| Genotype                                 | Expected | Observed | Normal | Dead | Abnormal head | Facial bleb | Facial hemorrhage | Body wall closure defects |
|------------------------------------------|----------|----------|--------|------|---------------|-------------|-------------------|---------------------------|
| $\alpha^{+fl};\beta^{+fl};W1C^{+/+}$     | 0.125    | 0.092    | 10/10  | 1    | 0/10          | 0/10        | 0/10              | 0/10                      |
| $\alpha^{+fl};\beta^{+fl};W1C^{+Tg}$     | 0.125    | 0.192    | 19/21  | 2    | 0/21          | 2/21        | 0/21              | 0/21                      |
| $\alpha^{+fl};\beta^{fl/fl};W1C^{+/+}$   | 0.125    | 0.117    | 13/14  | 0    | 1/14          | 0/14        | 0/14              | 0/14                      |
| $\alpha^{+fl};\beta^{fl/fl};W1C^{+Tg}$   | 0.125    | 0.075    | 7/9    | 0    | 1/9           | 0/9         | 1/9               | 0/9                       |
| $\alpha^{fl/fl};\beta^{fl/fl};W1C^{+/+}$ | 0.125    | 0.142    | 14/14  | 3    | 0/14          | 0/14        | 0/14              | 0/14                      |
| $\alpha^{fl/fl};\beta^{fl/fl};W1C^{+Tg}$ | 0.125    | 0.117    | 8/11   | 3    | 1/11          | 1/11        | 1/11              | 2/11                      |
| $\alpha^{fl/fl};\beta^{+fl};W1C^{+/+}$   | 0.125    | 0.117    | 12/14  | 0    | 1/14          | 0/14        | 1/14              | 0/14                      |
| $\alpha^{fl/fl};\beta^{+fl};W1C^{+Tg}$   | 0.125    | 0.150    | 13/16  | 2    | 1/16          | 1/16        | 1/16              | 0/16                      |

830  
 831 **Table 2.** Phenotypes of E13.5 embryos from intercrosses of *Pdgfra*<sup>fl/fl</sup>;*Pdgfrb*<sup>fl/fl</sup> mice  
 832 with *Pdgfra*<sup>+fl</sup>;*Pdgfrb*<sup>+fl</sup>;*Wnt1-Cre*<sup>+Tg</sup> mice.

| Genotype                                    | Expected | Observed | Normal | Dead | Facial Cleft | Facial bleb | Facial hemorrhage |
|---------------------------------------------|----------|----------|--------|------|--------------|-------------|-------------------|
| $\alpha^{+/fl}; \beta^{+/fl}; W1C^{+/+}$    | 0.125    | 0.077    | 5/5    | 3    | 0/5          | 0/5         | 0/5               |
| $\alpha^{+/fl}; \beta^{+/fl}; W1C^{+/Tg}$   | 0.125    | 0.173    | 5/16   | 2    | 0/16         | 10/16       | 2/16              |
| $\alpha^{+/fl}; \beta^{fl/fl}; W1C^{+/+}$   | 0.125    | 0.135    | 12/13  | 1    | 0/13         | 1/13        | 0/13              |
| $\alpha^{+/fl}; \beta^{fl/fl}; W1C^{+/Tg}$  | 0.125    | 0.154    | 2/13   | 3    | 0/13         | 11/13       | 9/13              |
| $\alpha^{fl/fl}; \beta^{+/fl}; W1C^{+/+}$   | 0.125    | 0.125    | 2/12   | 1    | 0/12         | 10/12       | 2/12              |
| $\alpha^{fl/fl}; \beta^{+/fl}; W1C^{+/Tg}$  | 0.125    | 0.115    | 0/12   | 0    | 12/12        | 12/12       | 9/12              |
| $\alpha^{fl/fl}; \beta^{fl/fl}; W1C^{+/+}$  | 0.125    | 0.144    | 5/14   | 1    | 0/14         | 9/14        | 2/14              |
| $\alpha^{fl/fl}; \beta^{fl/fl}; W1C^{+/Tg}$ | 0.125    | 0.077    | 0/8    | 0    | 8/8          | 7/8         | 8/8               |

833

834

**Table 3.** Bifurcation and intermingling of NCC streams entering PA3 and PA4 at E10.5.

| Genotype                                    | Bifurcated Stream 3 | Bifurcated Stream 4 | Intermingling of Streams 3 and 4 |
|---------------------------------------------|---------------------|---------------------|----------------------------------|
| $\alpha^{+/fl}; \beta^{+/fl}; W1C^{+/Tg}$   | 0/4                 | 2/5                 | 3/4                              |
| $\alpha^{+/fl}; \beta^{fl/fl}; W1C^{+/Tg}$  | 1/3                 | 3/3                 | 3/3                              |
| $\alpha^{fl/fl}; \beta^{+/fl}; W1C^{+/Tg}$  | 1/2                 | 2/3                 | 2/2                              |
| $\alpha^{fl/fl}; \beta^{fl/fl}; W1C^{+/Tg}$ | 2/3                 | 4/4                 | 3/3                              |

835

836

837 **Figure 1.**

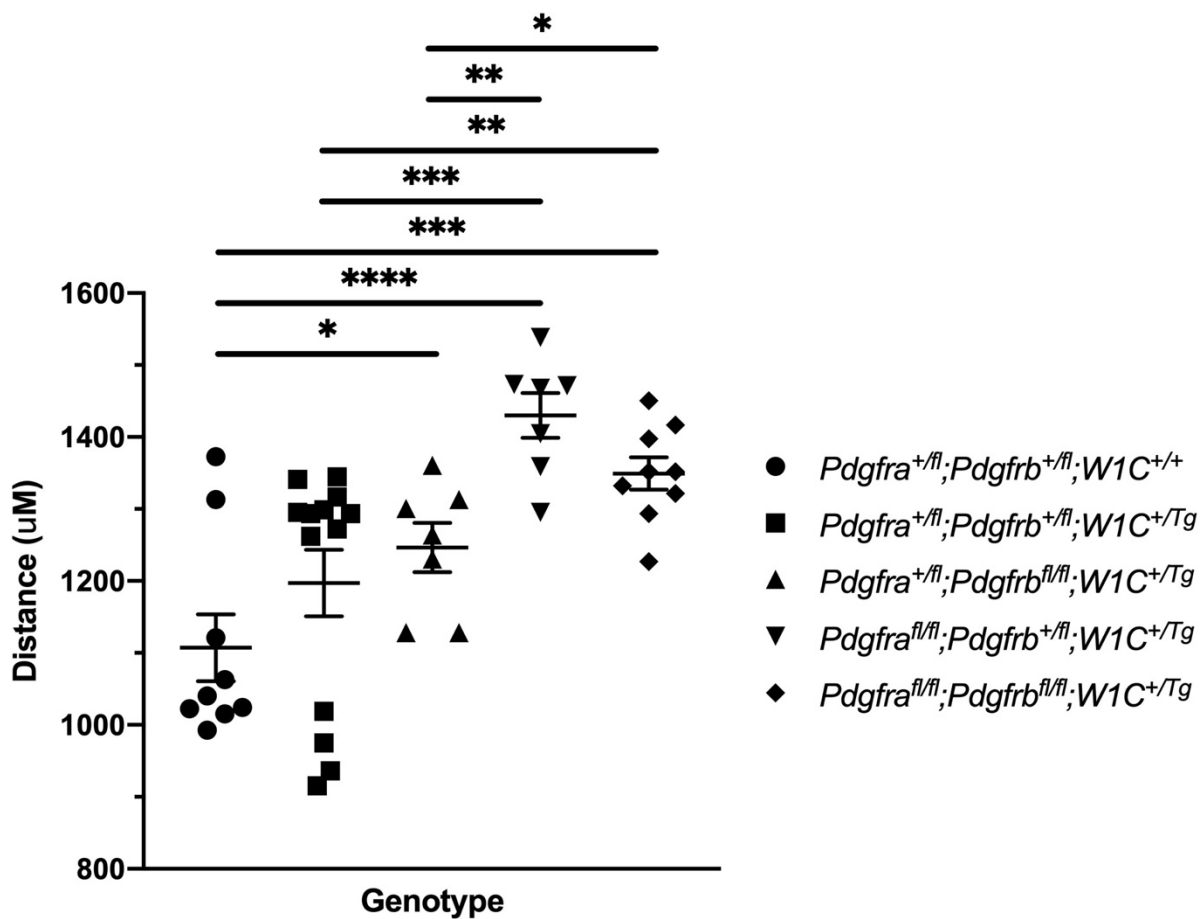

838  
839

840 **Figure 2.**

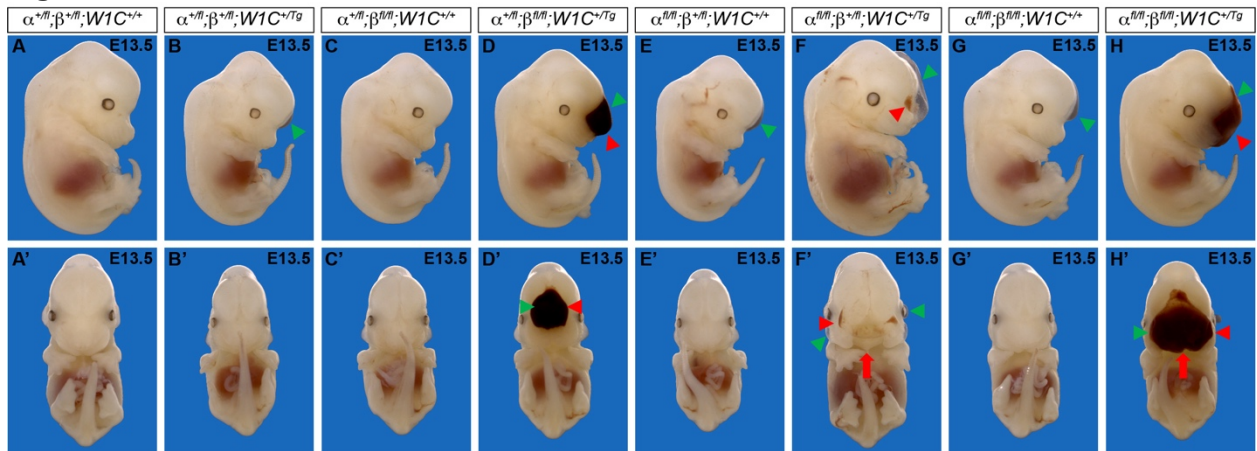

841  
842

843 **Figure 3.**

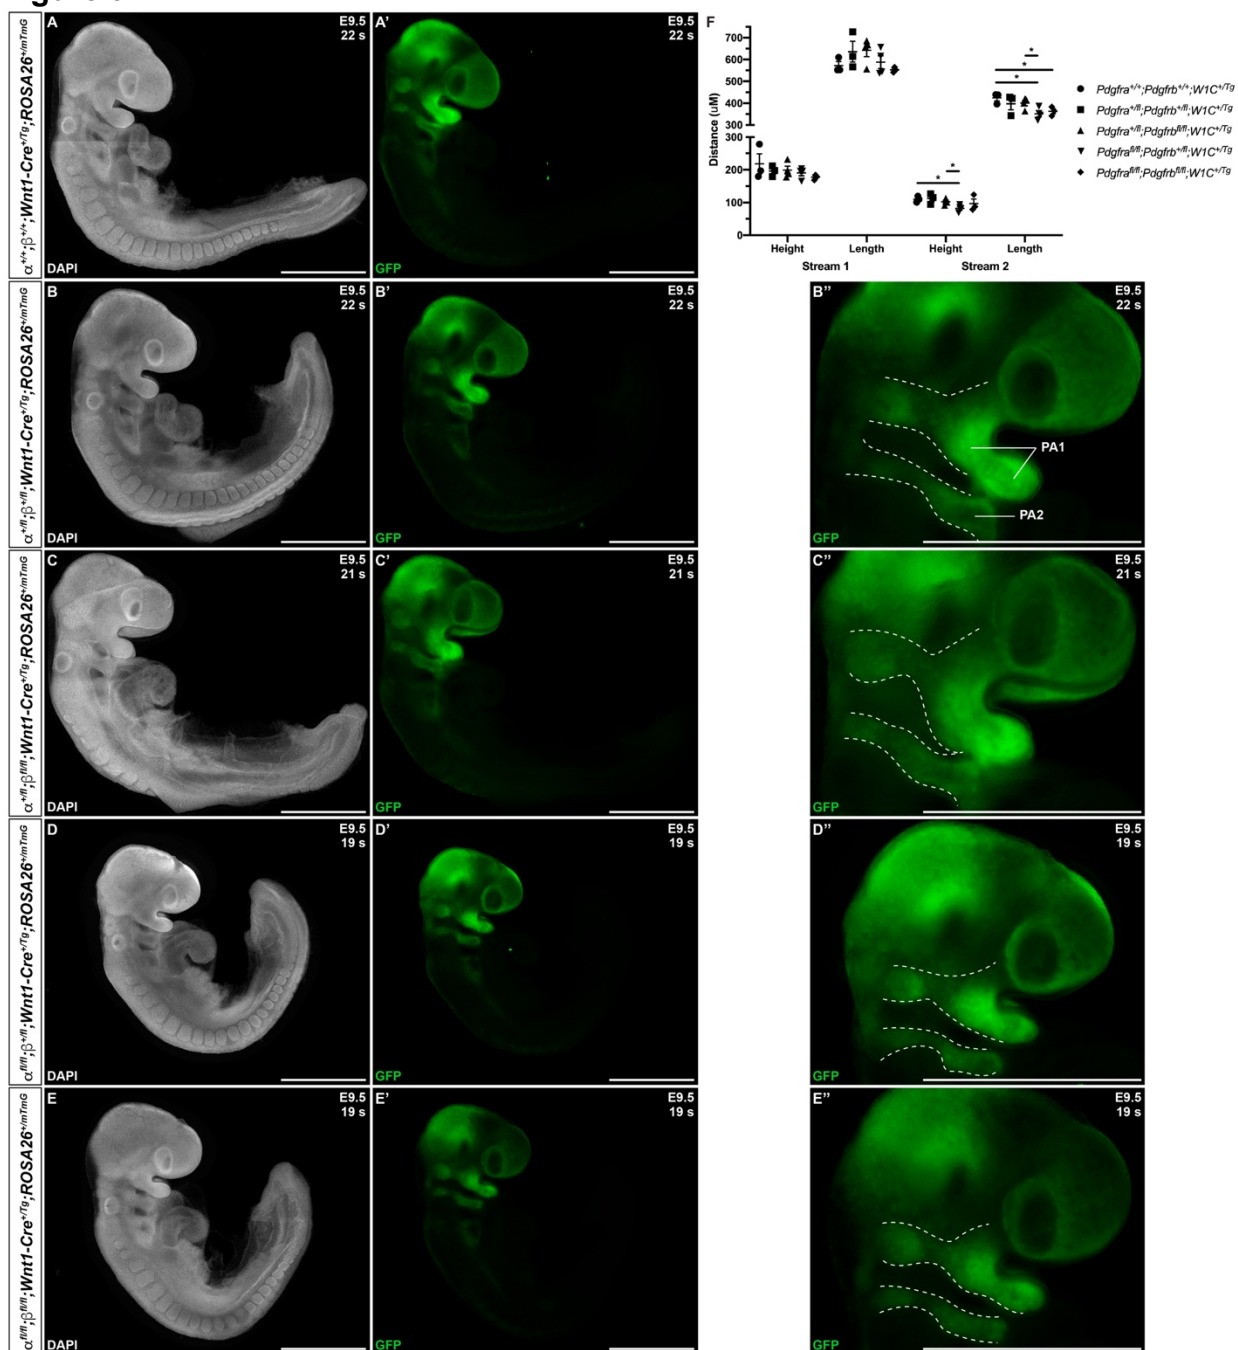

844  
845

846 **Figure 4.**

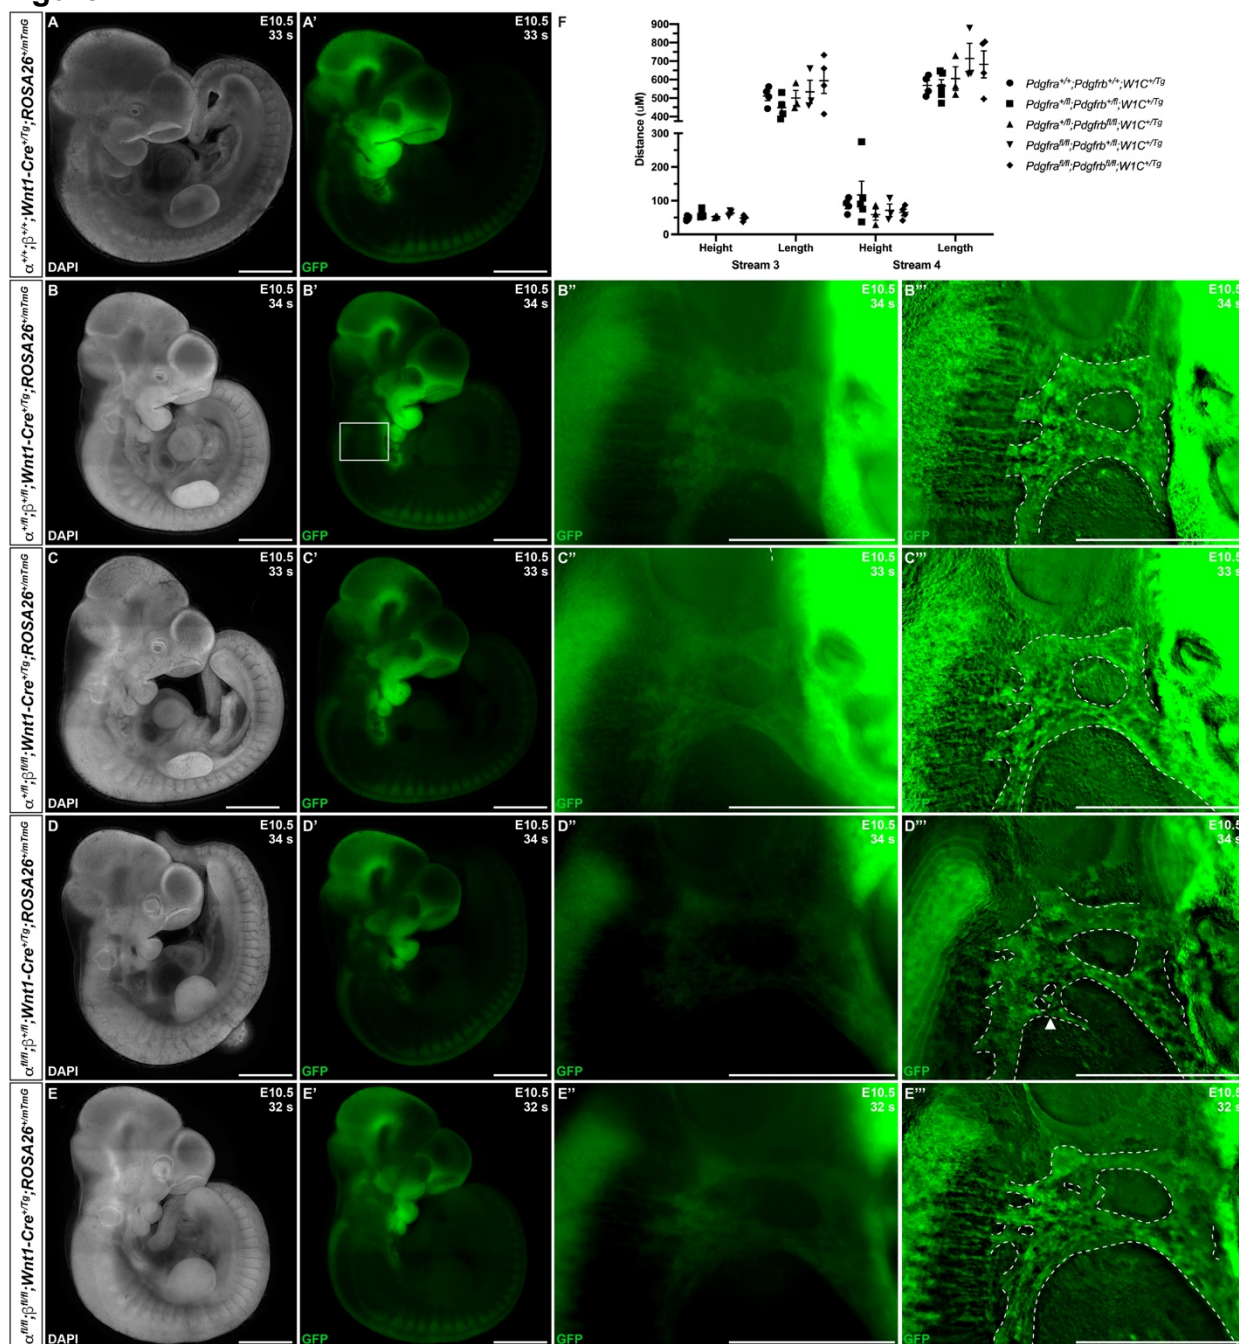

847  
848



849 **Figure 5.**

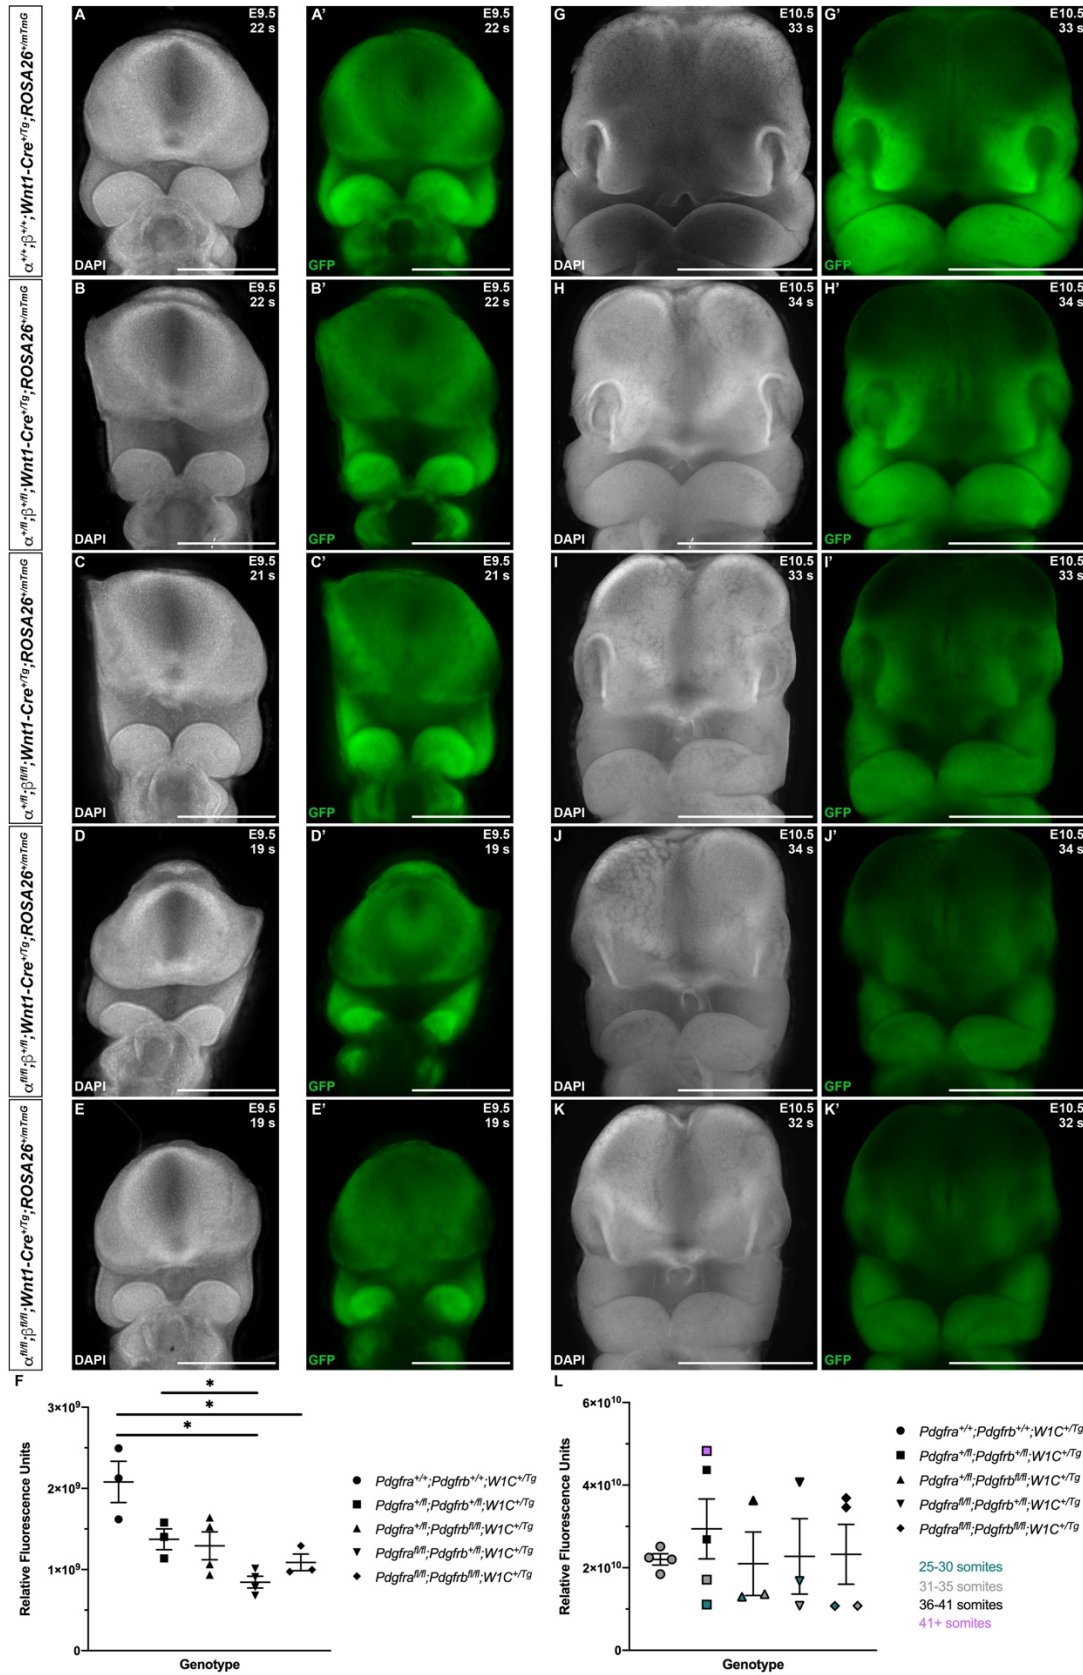

850

851 **Figure 6.**

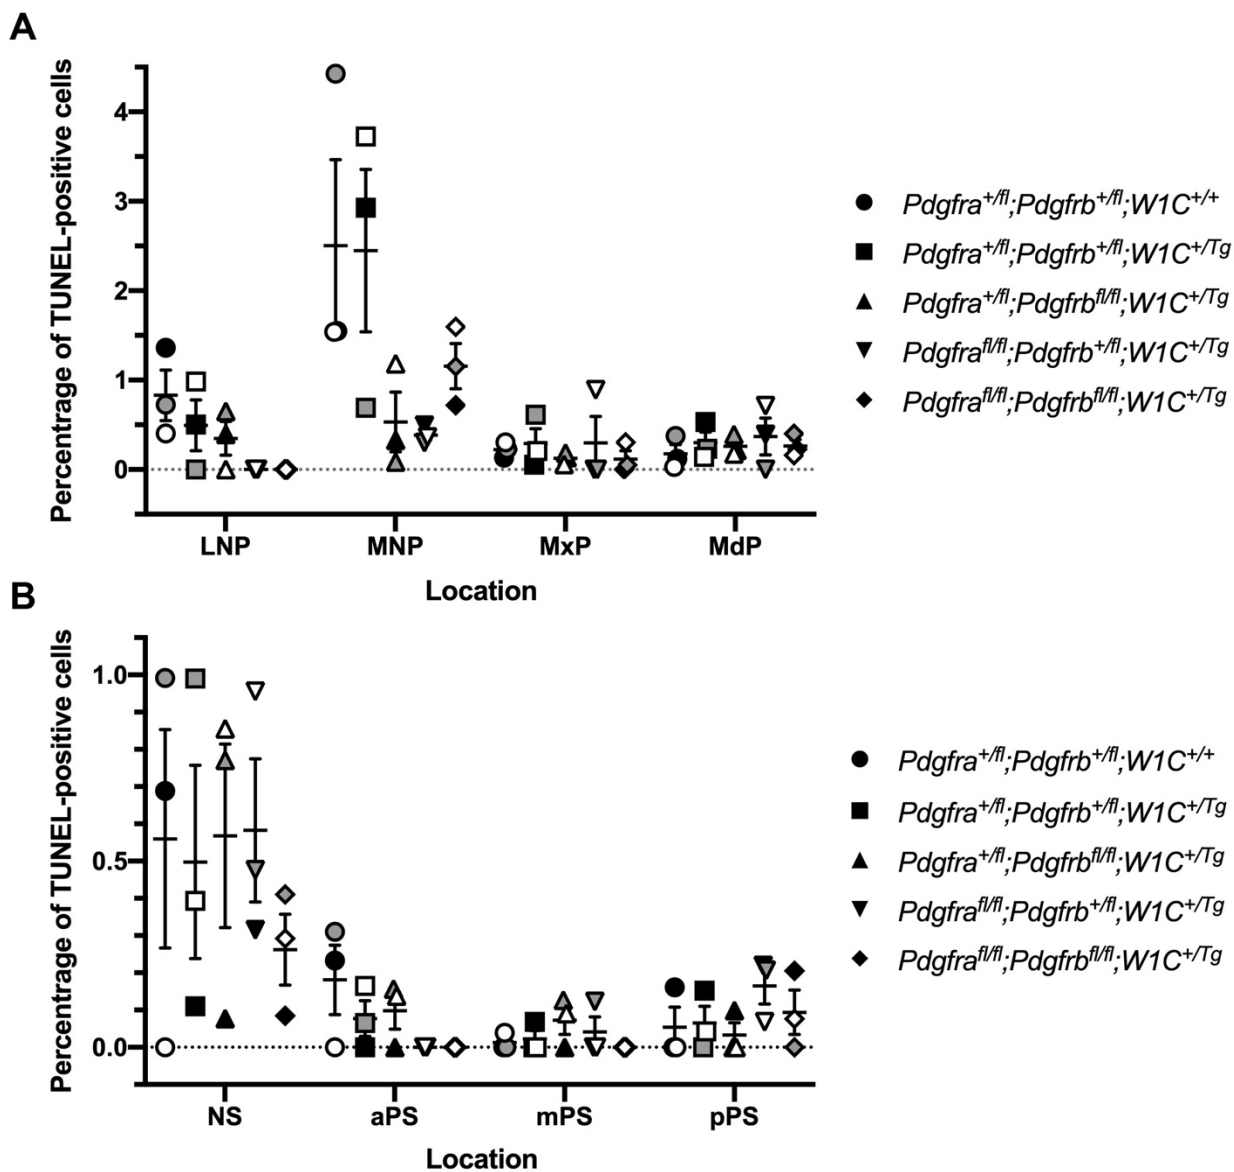

852  
853

854 **Figure 7.**

**A**

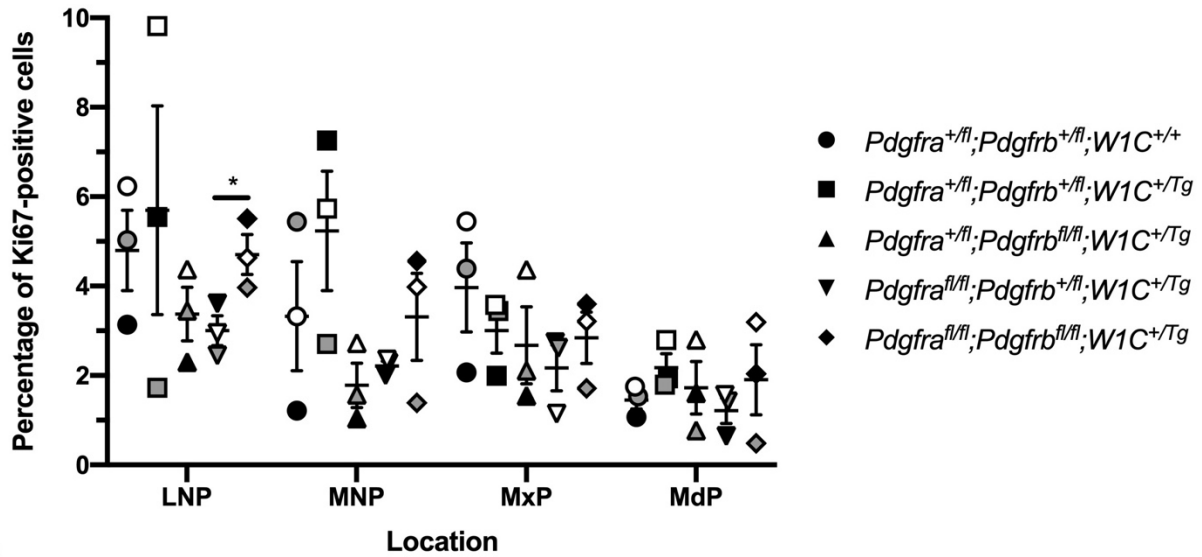

**B**

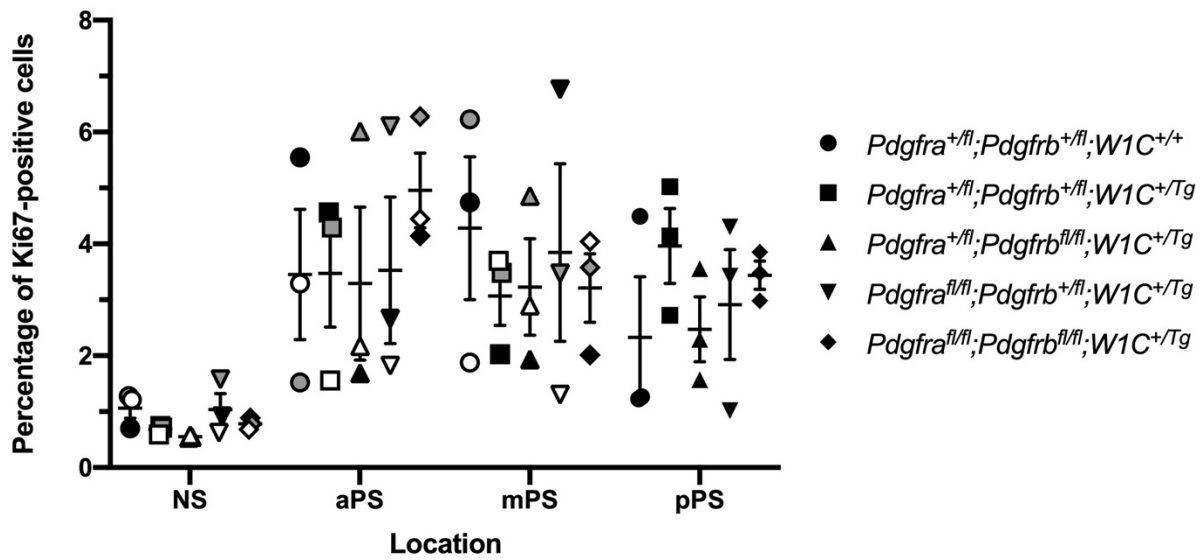

855

856

857 **Figure 8.**

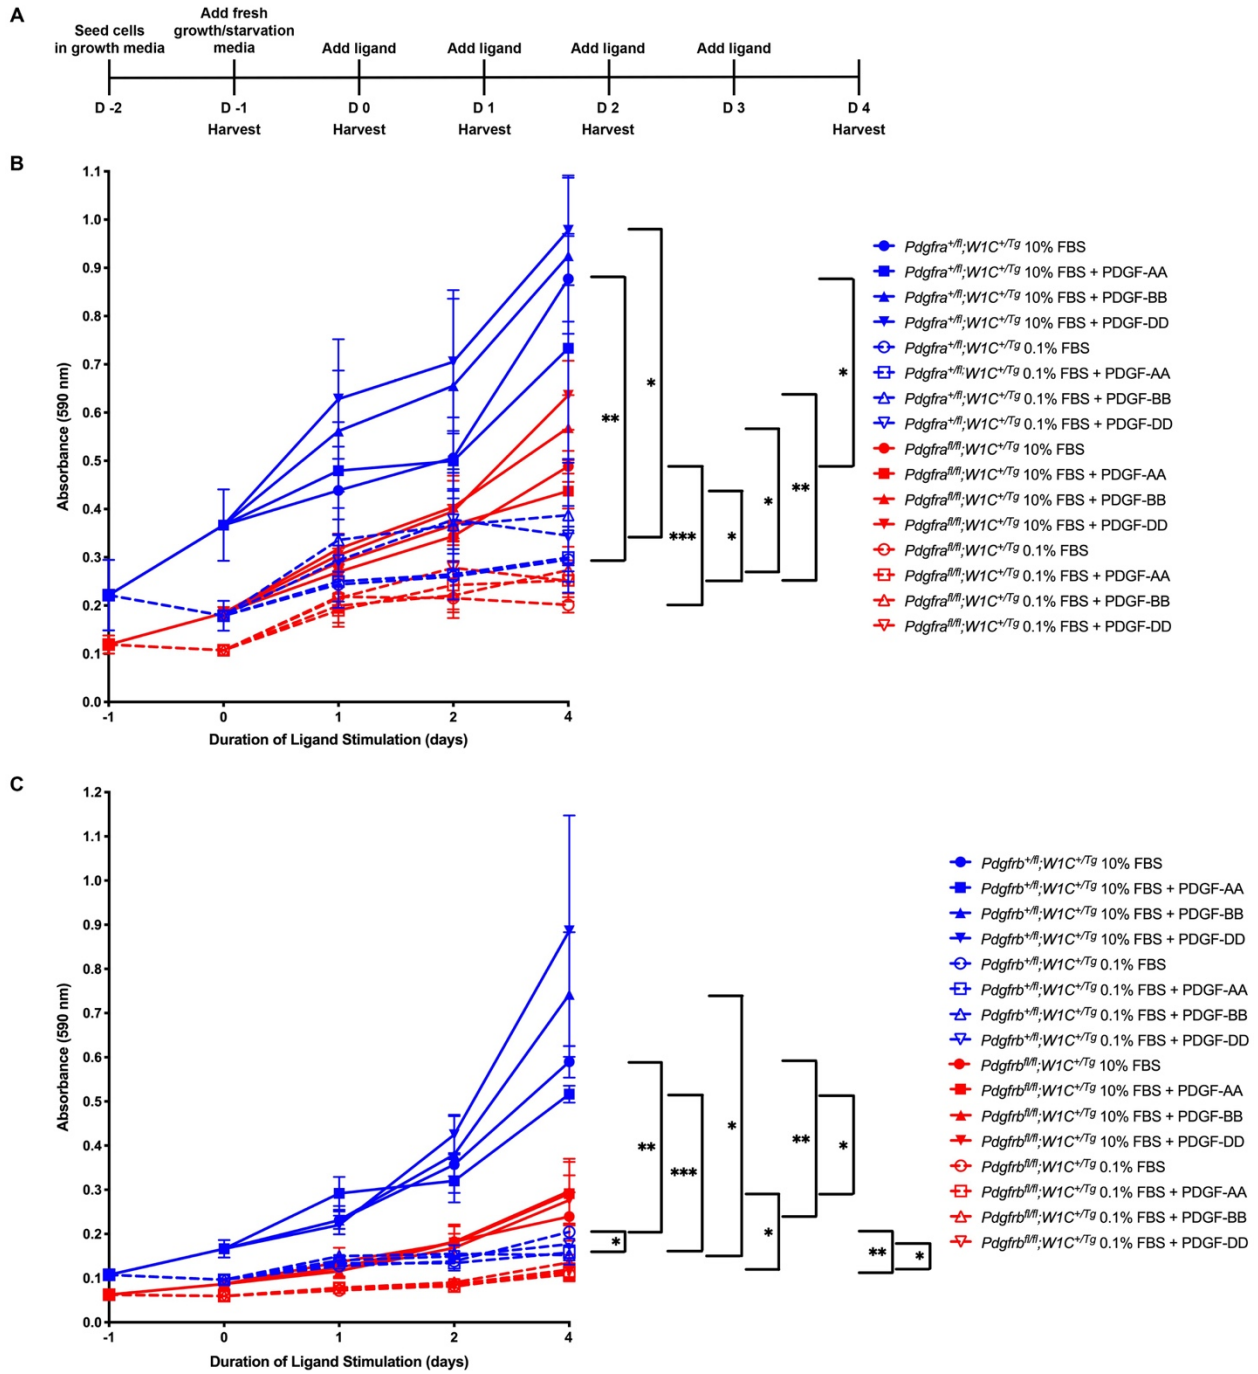

858
